1  
2  
3  
4  
5  
6  
7  
8  
9  
10  
11  
12  
13  
14  
15  
16  
17  
18  
19  
20  
21  
22  
23  
24  
25  
26

***RhIR, but not RhII, allows P. aeruginosa bacteria to evade Drosophila Tep4-mediated opsonization***

Samantha Haller<sup>1\*</sup>, Adrien Franchet<sup>1</sup>, Abdul Hakkim<sup>2, 3</sup>, Jing Chen<sup>4</sup>, Eliana Drenkard<sup>2, 3§</sup>, Shen Yu<sup>2, 3</sup>, Stefanie Schirmeier<sup>1€</sup>, Zi Li<sup>4</sup>, Frederick M. Ausubel<sup>2, 3</sup>, Samuel Liégeois<sup>1</sup>, and Dominique Ferrandon<sup>1, 4@</sup>

1) Université de Strasbourg, CNRS, RIDI UPR 9022, F-67000 Strasbourg, France

2) Department of Genetics, Harvard Medical School, Boston, MA 02115 USA

3) Department of Molecular Biology, Massachusetts General Hospital, Boston, MA 02114 USA

4) Sino-French Hoffmann Institute, Guangzhou Medical University, Guangzhou, P. R. China

\* Present address: Buck Institute for Research on Aging, Novato, CA 94945

§ Present address: Department of Pediatrics, Massachusetts General Hospital, Boston, MA 02114 USA

€ Present address: Institut für Neuro- und Verhaltensbiologie, Badestrasse 9, D-48149 Münster

@ To whom correspondence should be addressed ([D.Ferrandon@ibmc-cnrs.unistra.fr](mailto:D.Ferrandon@ibmc-cnrs.unistra.fr))

*Running title: RhIR, not RhII, eludes Tep4 opsonization*

Key words: quorum-sensing/intestinal infection/phagocytosis/ *Pseudomonas* PA14 type II secretion system/vfR.

27

## 28 **ABSTRACT**

29 When *Drosophila* flies feed on *Pseudomonas aeruginosa* PA14, some bacteria cross the  
30 intestinal barrier and start proliferating intensely inside the hemocoel. This process is limited  
31 by hemocytes through phagocytosis. We have previously shown that the PA14 quorum-  
32 sensing regulator RhIR is required for the bacteria to elude the cellular immune response. RhII  
33 synthesizes the auto-inducer signal that activates RhIR. Here, we have carefully compared the  
34 null mutant phenotypes of *rhlR* and *rhlI*. Surprisingly, unlike  $\Delta rhlR$  mutants,  $\Delta rhlI$  mutants  
35 are only modestly attenuated for virulence and are poorly phagocytosed and opsonized in a  
36 Thioester-containing Protein4-dependent manner. Likewise,  $\Delta rhlI$  but not  $\Delta rhlR$  mutants  
37 colonize the digestive tract of *Caenorhabditis elegans* and kill it as efficiently as wild-type  
38 PA14. Thus, RhIR has an RhII-independent function in eluding detection or counter-acting the  
39 action of the immune system. In contrast to the intestinal infection model, *Tep4* mutant flies  
40 are more resistant to PA14 in a septic injury model, also an *rhlR*-dependent property. Thus,  
41 the Tep4 putative opsonin can either be protective or detrimental to host defense depending  
42 on the infection route.

43

## 44 **INTRODUCTION**

45 *Drosophila melanogaster* is a powerful genetic model organism for the study of innate  
46 immunity that has been intensely investigated during the past 25 years (Buchon, Silverman et  
47 al., 2014). It thus represents an informative system in which to study host-pathogen  
48 interactions using either systemic infection or so-called "natural" infection paradigms, such as  
49 oral infection (Bier & Guichard, 2012, Igboin, Griffen et al., 2012, Limmer, Quintin et al.,  
50 2011b). Genetic analysis has allowed the detailed dissection of the *Drosophila* systemic  
51 immune response to microbial infections (Lemaitre & Hoffmann, 2007). In addition to

52 melanization which is mediated by the protease-mediated cleavage of prophenol oxidase into  
53 active phenol oxidase, two major NF-kappaB pathways, Toll and Immune deficiency (IMD),  
54 regulate the induction of the expression of genes that encode potent antimicrobial peptides,  
55 which are active against most bacteria and fungi (Ferrandon, Imler et al., 2007, Ganesan,  
56 Aggarwal et al., 2010, Lemaitre & Hoffmann, 2007). The *Drosophila* systemic immune  
57 response is so effective, especially in the case of Gram-negative bacterial infections, that a  
58 second arm of host defense, the cellular immune response, has remained comparatively less  
59 well studied (Pean & Dionne, 2014). Indeed, blocking cellular immunity through saturation of  
60 the phagocytic apparatus with inert particles does not yield a strong susceptibility phenotype  
61 of flies infected by *Escherichia coli*, unless the systemic immune response is at least also  
62 partially impaired (Elrod-Erickson, Mishra et al., 2000). Nevertheless, we have found that  
63 when two opportunistic pathogens *Serratia marcescens* and *Pseudomonas aeruginosa* are fed  
64 to *Drosophila*, the cellular immune response plays a key role in controlling the bacteria that  
65 escape from the digestive tract (Limmer, Haller et al., 2011a, Nehme, Liegeois et al., 2007).  
66 In both cases, the putative phagocytic receptor Eater plays a crucial role and prevents the  
67 development of a rapid bacteremia (Kocks, Cho et al., 2005, Limmer et al., 2011a).

68 The thioester-containing protein Tep1 opsonizes bacteria in the mosquito species *Anopheles*  
69 *gambiae* (Levashina, Moita et al., 2001). It is unknown whether opsonization also plays a role  
70 *in vivo* in *Drosophila*, even though its genome encodes five functional *Tep* loci and a  
71 pseudogene (*Tep5*) (Bou Aoun, Hetru et al., 2011). The thioester motif is not present in Tep6  
72 and is therefore thought to be nonfunctional. Indeed, Tep6 is required for the establishment of  
73 septate junctions in specific parts of the gut, which explains the lethal phenotype of *Tep6* null  
74 mutants (Batz, Forster et al., 2014, Hall, Bone et al., 2014). Tep6 has also been shown to  
75 induce autophagy in macrophages via a non cell-autonomous process that involves epithelial  
76 cells in which it is expressed (Lin, Rodrigues et al., 2017). A previous study failed to find a

77 role of the remaining *Tep* genes (*Tep1* to *Tep4*) in host defense in several models of bacterial  
78 or fungal systemic infections (Bou Aoun et al., 2011), although a study reported that *Tep3*  
79 mutant flies are highly susceptible to the nematode parasite *Heterorhabditis bacteriophora*  
80 (Arefin, Kucerova et al., 2014). Interestingly, a study led in *Drosophila* cultured S2 cells  
81 reported that *Tep2* is required for the phagocytosis of the Gram-negative species *Escherichia*  
82 *coli*, *Tep3* for the uptake of the Gram-positive *Staphylococcus aureus*, and unexpectedly that  
83 *Tep6* is required to phagocytose the dimorphic yeast *Candida albicans* (Stroschein-Stevenson,  
84 Foley et al., 2006).

85 In contrast to *S. marcescens*, the *P. aeruginosa* strain PA14 ultimately manages to establish  
86 an exponential infection in the hemocoel four to five days after its ingestion. In a previous  
87 study, we showed that a member of the LuxR family of signal receptor-transcriptional  
88 regulators in PA14, RhlR, is required to circumvent the cellular immune response (Limmer et  
89 al., 2011a). Indeed, *rhlR* mutants are almost avirulent in an intestinal infection model since  
90 they remain at very low levels in the hemolymph and kill the infected flies at a much reduced  
91 rate. Interestingly, the cellular immune response remains functional until late stages of a  
92 PA14 infection, suggesting that hemocytes are not directly targeted by the PA14 strain, unlike  
93 what happens with *P. aeruginosa* strain CHA, which neutralizes *Drosophila* phagocytosis  
94 through the secretion of its ExoS toxin into hemocytes (Avet-Rochex, Bergeret et al., 2005).

95 RhlR is the major regulator of one of the three known quorum-sensing systems in *P.*  
96 *aeruginosa*. Quorum-sensing systems play a major role in coordinating the expression of  
97 virulence genes in several infection models (Coggan & Wolfgang, 2012, Jimenez, Koch et al.,  
98 2012, Schuster, Sexton et al., 2013, Williams & Camara, 2009). However, we have failed to  
99 uncover a strong role for the other two *P. aeruginosa* quorum sensing systems regulated by  
100 LasR and MvfR in the *Drosophila* intestinal infection model (Limmer et al., 2011a). This  
101 observation was somewhat unexpected since the Las system appears to function upstream of

102 the Rhl quorum sensing system. RhlR is activated by binding to an auto-inducer molecule,  
103 butanoyl-homoserine lactone (C4-HSL), which is synthesized by the RhlI enzyme. The  
104 transcription of the *rhlI* and *rhlR* genes is in turn activated by the Las transcriptional regulator  
105 LasR (Coggan & Wolfgang, 2012, Jimenez et al., 2012, Schuster et al., 2013, Williams &  
106 Camara, 2009). Activation of RhlR takes place when a threshold concentration of C4-HSL is  
107 reached, which correlates in *in vivo* studies with a threshold bacterial concentrations reached  
108 during exponential growth.

109 Here, we found that the virulence phenotype exhibited by ingested PA14 *rhlI* mutants is  
110 strikingly distinct from that exhibited by *rhlR* mutants, suggesting that RhlR can function  
111 independently of activation by C4-HSL. We further establish that RhlR, but not RhlI, is  
112 required to elude opsonization by a *Tep4*-dependent process. Finally, we establish that in  
113 contrast to its protective role during PA14 intestinal infections, *Tep4* plays an opposite role in  
114 a systemic infection model, possibly by preventing the activation of the phenol oxidase  
115 cascade.

## 116 RESULTS

### 117 ***ΔrhlI* is more virulent than *ΔrhlR* in the *Drosophila* intestinal infection model**

118 RhlR is activated by the C4-HSL synthesized by the RhlI enzyme, at least in numerous *in*  
119 *vitro* studies (Gambello, Kaye et al., 1993, Latifi, Winson et al., 1995, Pesci, Pearson et al.,  
120 1997, Seed, Passador et al., 1995). Thus, we expected that *rhlI* and *rhlR* mutants would  
121 display the same phenotype. Unexpectedly, however, although a *ΔrhlI* deletion mutant strain  
122 was indeed less virulent than wild-type PA14 when ingested by flies, it was significantly  
123 more virulent than *ΔrhlR* (Fig. 1A, B). Moreover, whereas the *ΔrhlR* mutants were cleared  
124 from the hemolymph, the *ΔrhlI* mutant proliferated in this compartment, although it appeared  
125 to grow less rapidly than wild-type PA14 (Fig. 1C, D). Consistent with this latter result, *ΔrhlI*

126 but not *ΔrhIR* triggered the systemic immune response, as monitored by measuring the  
127 expression of the *Diptericin* gene (Fig. S1E-F). Similar results were obtained with  
128 independent *ΔrhIR* and *ΔrhII* in frame deletion mutants constructed by another laboratory (Fig.  
129 S1) (Hoyland-Kroghsbo, Paczkowski et al., 2017), thereby confirming the correlation  
130 between the *ΔrhIR* and *ΔrhII* null genotypes and the differing *ΔrhIR* and *ΔrhII* phenotypes.

131 We next tested the survival rates of flies in which the cellular response had been ablated by  
132 injecting latex beads (LXB) after feeding on wild-type or *ΔrhIR* or *ΔrhII* mutant bacteria.  
133 Both *ΔrhIR* and *ΔrhII* killed latex bead-injected flies much faster than PBS-injected control  
134 flies, at approximately the same rate (Fig. 1E, F). In addition, both *ΔrhIR* and *ΔrhII* killed  
135 latex bead-injected flies slower than wild-type PA14, with the difference between *ΔrhII* and  
136 wild-type PA14 at the borderline of statistical significance ( $p=0.07$ ). It is important to  
137 determine whether this apparently enhanced virulence of *ΔrhIR* and *ΔrhII* mutants observed  
138 in phagocytosis-impaired flies is just a reflection of the increased virulence of wild-type PA14  
139 in these immuno-deficient flies, or whether the enhanced virulence of the *ΔrhIR* and *ΔrhII*  
140 mutants is indicative of the fact that the RhIR-mediated regulatory systems plays an important  
141 role in counteracting the cellular immune response. To this end, it is useful to measure the  
142 difference in  $LT_{50}$  values of control vs. latex bead-injected flies ( $LT_{50}[wt-w^{LXB}]$ ) for each  
143 mutant and to compare it to that measured for wild-type PA14. *ΔrhIR* did recover virulence  
144 with a  $LT_{50}[wt-w^{LXB}]$  of 4.7 days, as compared to 2.4 days for wild-type PA14, which  
145 corresponds to the level of recovered virulence reported earlier (Fig. 1G) (Limmer et al.,  
146 2011a). With a value of 3.5 days, *ΔrhII* displayed an intermediate  $LT_{50}[wt-w^{LXB}]$ , although  
147 the significance of the difference with wild-type PA14 or *ΔrhIR* could not be assessed as the  
148 *ΔrhII* values were too spread out (Fig. 1G). Indeed, *ΔrhII* mutants consistently tended to  
149 display a more variable survival phenotype (Fig. 1B).

150 Finally, both the  $\Delta rhlR$  and  $\Delta rhII$  mutant strains yielded similarly shaped survival curves  
151 when used to infect flies with an impaired cellular defense. These survival curves were less  
152 steep than those obtained with wild-type PA14, as measured by their Hill coefficients (Fig.  
153 1H). This suggests that quorum-sensing is somehow involved in shaping the survival curve.  
154 This reflects a collective property of flies placed in the same vial, which succumb less  
155 synchronously during infections when the *rhl* quorum sensing system is missing.

### 156 ***rhII and wild-type PA14, but not rhlR, strains colonize the C. elegans digestive tract***

157 The nematode *C. elegans* is a well-established model host to study *P. aeruginosa*  
158 pathogenesis (Irazoqui, Urbach et al., 2010, Pukkila-Worley & Ausubel, 2012, Tan, Mahajan-  
159 Miklos et al., 1999a). The *C. elegans* intestinal infection model shares some key features with  
160 the *Drosophila* model, at least during the initial stages of the infection. For instance, in both  
161 models, ingested bacteria are exposed in the gut lumen to antimicrobial peptides and to  
162 reactive oxygen species generated by the Dual oxidase enzyme. However, in contrast to  
163 ingested *P. aeruginosa* in *Drosophila*, PA14 are not known to escape from the gut  
164 compartment during the nematode infection. We therefore tested whether the differences that  
165 we observed in the virulence of  $\Delta rhlR$  and  $\Delta rhII$  mutants in the *Drosophila* intestinal infection  
166 assay were reflected in a well-established *C. elegans* – *P. aeruginosa* nematode “slow killing”  
167 survival assay (McEwan, Feinbaum et al., 2016, Tan et al., 1999a). Indeed, two independently  
168 constructed in frame *rhlR* deletion mutants in the PA14 background were dramatically less  
169 virulent than two independently constructed *rhII* deletion mutants in their ability to kill *C.*  
170 *elegans* (Fig. 2A)

171 The primary *C. elegans* immune response occurs in intestinal epithelial cells and because the  
172 worms are transparent, host-pathogen interactions can be easily visualized in the intestinal  
173 lumen. Thus, in addition to the *C. elegans* survival assay (Fig. 2A), we also used a

174 quantitative assay (Figs. 2B-E; see Materials and Methods) that monitors the accumulation of  
175 live bacterial cells in the intestine of the nematodes using PA14, *ΔrhIR*, and *ΔrhII* expressing  
176 GFP to monitor the level of intestinal colonization. Live wild-type *P. aeruginosa* PA14 cells  
177 start accumulating in the intestine 24-48 hours post infection. Consistent with the *Drosophila*  
178 infection assays described in Fig. 1, two independent *ΔrhIR* mutants in the PA14 background  
179 colonized the *C. elegans* intestine at significantly lower levels than two independent *ΔrhII*  
180 mutants. Indeed, in this colonization assay, the *ΔrhII* mutants were indistinguishable from  
181 wild-type PA14, similar to the results in the nematode killing assay. An alternative  
182 explanation for these results is that *C. elegans* preferentially feeds on the *ΔrhII* mutant  
183 compared to the *ΔrhIR* mutant and simply overwhelms the immune response with a larger  
184 number of ingested cells. However, this possibility was ruled out by monitoring the pumping  
185 (feeding) rate of *C. elegans* feeding on wild-type, *ΔrhIR* and *ΔrhII* mutants. *C. elegans*  
186 pumped at the same rate on all three strains (Fig. S2).

187 ***Phagocytosis protects Drosophila against invasion of its hemocoel by wild-type PA14***  
188 ***during the early phase of the infection***

189 In the *Drosophila* intestinal infection model, flies constantly feed on PA14 present on a filter.  
190 A defining feature of this model is that while bacteria are able to rapidly cross the intestinal  
191 barrier to penetrate the hemocoel, as had been previously described for *Serratia marcescens*,  
192 the PA14 titer in the hemolymph remains low for the first few days of the infection. After this  
193 initial incubation period, there is an exponential proliferation of PA14 in the hemocoel, which  
194 coincides with the activation of the systemic immune response. Using bacteria expressing  
195 different colored fluorescent proteins, we have previously shown that *S. marcescens*  
196 continuously crosses the intestinal barrier during the infection. Fig. 3A-B shows that when  
197 flies that have been feeding on dsRed-labeled PA14 bacteria for four days were switched to a



198 filter laced with GFP-labeled PA14, the green bacteria progressively replaced the red bacteria  
199 both in the gut and hemocoel compartments. We conclude that *P. aeruginosa*, like *S.*  
200 *marcescens*, continuously crosses the intestinal barrier during the infection.

201 Next, we asked at what time periods during an infection was phagocytosis important in  
202 preventing PA14 growth in the hemolymph. To this end, we saturated the phagocytic  
203 apparatus of hemocytes by injecting latex beads into flies at different time points during  
204 infection. As expected, blocking phagocytosis one day prior to the infection led to an earlier  
205 demise of the PA14-infected flies compared to PBS-injected control flies. Similar results were  
206 found when latex beads were injected four hours or one day after infection, although in the  
207 latter case the difference was not significant (its value was nevertheless similar to that  
208 obtained by injection one day prior to infection at -1 day; Fig. 3C). In contrast to injecting the  
209 latex beads one day after infection, the injection of latex beads four or six days after the  
210 beginning of the ingestion of wild-type PA14 did not modify the survival rate of flies. That is,  
211 the  $LT_{50}$  values were similar to those of control (PBS-injected) flies, consistent with the  
212 conclusion that starting about four days after infection the cellular immune response no longer  
213 plays a major role in limiting a wild-type PA14 infection.

214 In contrast to wild-type PA14,  $\Delta rhIR$  bacteria were kept in check by phagocytosis at least up  
215 to day four and to some extent up to six days after infection (Fig. 3D, F). Phagocytosis was  
216 also efficient against  $\Delta rhII$  bacteria for at least four days (Fig. 3E, F). These data suggest that  
217  $\Delta rhIR$  bacteria are constantly kept in check by the cellular immune response when penetrating  
218 the hemocoel, whereas wild-type PA14 ultimately escape this immune surveillance.  $\Delta rhII$   
219 mutant bacteria display an intermediate phenotype, with a somewhat decreased virulence in  
220 flies in which phagocytosis was blocked at day 4 that is similar to that observed with  $\Delta rhIR$   
221 (Fig. 3F).

222 A recent study has reported that hemocytes are recruited to the gut after the ingestion of  
223 bacteria (Ayyaz, Li et al., 2015). We confirmed this finding in the case of *P. aeruginosa* oral  
224 infection, with a significant recruitment observed at four hours after the beginning of the  
225 infection with either wild-type PA14 or  $\Delta rhl$  mutants (Fig. 3G-H, Fig. S3). While hemocytes  
226 remained associated with the midgut for at least three days after the beginning of the ingestion  
227 of wild-type PA14 or  $\Delta rhlR$  bacteria, they were not at three days in the case of  $\Delta rhlI$  bacteria  
228 (Fig. 3H). While some ingested bacteria could be detected in the hemocytes recruited to the  
229 gut, this phenomenon was not reproducible enough to allow reliable quantification.

### 230 ***Drosophila Tep4 is required for host defense against ingested PA14***

231 Our previous work had shown that flies mutant for the putative phagocytic receptor gene  
232 *Eater* are more susceptible to PA14 ingestion and display a phenotype similar to that obtained  
233 by latex bead-mediated ablation of the phagocytic capacity of hemocytes (Limmer et al.,  
234 2011a). Thioester -containing proteins have been reported to be required for phagocytosis in  
235 mosquitoes and also in cultured *Drosophila* S2 cells (Levashina et al., 2001, Stroschein-  
236 Stevenson et al., 2006). We therefore tested mutations affecting the *Tep2*, *Tep3*, and/or *Tep4*  
237 genes (Bou Aoun et al., 2011). In the case of *Tep1*, since no mutants were available, we tested  
238 this gene using an RNAi transgenic line expressed either in hemocytes or in the fat body.  
239 However, we did not observe any change in the virulence of ingested PA14 (Fig. S4A, B).  
240 *Tep4* and triple *Tep2-Tep3-Tep4* mutants displayed increased susceptibility to PA14 ingestion,  
241 in contrast to *Tep3* and double *Tep2-Tep3* mutants that displayed respectively a somewhat  
242 decreased or wild-type susceptibility (Fig. 4A, D-E). Of note, uninfected *Tep3* mutants fed on  
243 a sucrose solution displayed an enhanced fitness when compared to wild-type or other *Tep*  
244 mutant lines (Fig. S4C). We conclude from these data that *Tep4*, but not other thioester-  
245 containing proteins, is required for host defense against ingested PA14.

246 Next, we found that  $\Delta rhIR$  became as virulent as wild-type PA14 when ingested by *Tep4* or  
247 *Tep2-Tep3-Tep4* mutants, which was not observed with the *Tep2* and *Tep2-Tep3* mutant  
248 strains (Fig. 4B-E). Interestingly, the injection of latex beads in *Tep4* flies only modestly  
249 increased the virulence of *rhIR* bacteria when compared to PBS-injected *Tep4* flies (Fig. S4 D,  
250 E), suggesting that phagocytosis of PA14 is severely affected in the *Tep4* mutant. *ΔrhII*  
251 bacteria behaved like *ΔrhIR* bacteria when ingested by *Tep4* (Fig. 4C-E), similarly to flies  
252 injected with latex beads (Fig. 1E), although *ΔrhIR* recovered virulence to a much larger  
253 extent (3.1 days) than *ΔrhII* (0.9 days) when ingested by *Tep4* flies. Hence, the behavior of  
254 *ΔrhIR* mutant PA14 is similar in *eater* and *Tep4* mutant flies, thereby raising the possibility  
255 that both fly genes are involved in the same process, in keeping with an unchanged phenotype  
256 of *Tep4* when phagocytosis was blocked by the injection of latex beads (Fig. S4D).

#### 257 ***Phagocytosis of PA14 bacteria is impaired in Tep4 mutant hemocytes***

258 To quantitatively monitor the uptake of PA14, we used assays that relied on larval hemocytes.  
259 First, we injected heat-killed, pHrodo®-labeled bacteria in wild-type or *Tep4* third-instar  
260 larvae. The dye becomes fluorescent when placed in an acidic environment such as that  
261 encountered in phagosomes. After 45 minutes, the larvae were bled and a phagocytic index  
262 was established. Wild-type hemocytes ingested significantly more PA14 or *ΔrhIR* bacteria  
263 than *Tep4* hemocytes (Fig. 5A). There were however no significant differences between heat-  
264 killed wild-type PA14 and *rhIR* bacteria uptake by wild-type hemocytes on the one hand, or  
265 *Tep4* hemocytes on the other (Fig. 5A). This was not necessarily unexpected as heat-killing  
266 likely inactivates *rhIR*-dependent virulence factors and might also alter the surface of bacteria.  
267 We therefore modified the assay with live bacteria and used an antibody we had raised against  
268 PA14 to immuno-stain the bacteria differentially, prior and after permeabilization of the fixed  
269 cells. As before, *Tep4* hemocytes exhibited a decreased uptake of bacteria compared to wild-

270 type hemocytes. However, in the case of live bacteria, *rhlR* bacteria were significantly better  
271 phagocytosed than wild-type PA14 bacteria when injected into wild-type or *Tep4* larvae. *rhlI*  
272 exhibited an intermediate phenotype in this assay and was not significantly different from  
273 either wild-type or *rhlR* bacteria. We conclude that this assay is not sensitive enough to  
274 discriminate between these two bacterial mutant strains. We obtained similar results using the  
275  $\Delta rhlR$  and  $\Delta rhlI$  strains generated by another laboratory (Fig. S1G).

### 276 ***Tep4* opsonizes *rhlR* better than *rhlI* or wild-type bacteria**

277 We next designed an experiment to assess whether *Tep4* functions as an opsonin, *i.e.*, that it is  
278 deposited on the surface of bacteria to facilitate its detection and subsequent ingestion by  
279 hemocytes. To this end, we collected the hemolymph from either wild-type or *Tep4* larvae  
280 and incubated it with live bacteria. These bacteria were then retrieved and injected into either  
281 naive wild-type or *Tep4* mutant larvae prior to bleeding these injected larvae to be able to  
282 count the ingested bacteria as described above (Fig. 6A). Wild-type PA14 were poorly  
283 phagocytosed in this assay (medians of phagocytic index lower than 10, Fig. 6C), when the  
284 opsonized bacteria were first incubated in the hemolymph of *Tep4*-containing wild-type  
285 larvae and then secondarily injected into wild-type or *Tep4* larvae (although the former  
286 yielded a significantly increased phagocytic index, as compared to bacteria incubated first in  
287 *Tep4* hemolymph; Fig. 6B-E). In contrast, bacteria that had been first incubated in *Tep4*  
288 mutant hemolymph were hardly ingested when re-injected into *Tep4* larvae (Fig. 6E). Re-  
289 injection of these bacteria into wild-type larvae recipients modestly increased the phagocytic  
290 index (Fig. 6E), which was nevertheless lower than that of bacteria that had been pre-  
291 incubated with wild-type hemolymph (Fig. 6C). When these experiments were performed  
292 using  $\Delta rhlR$  bacteria that were ultimately injected in *Tep4* larval recipients, it made a major  
293 difference as to whether these mutant bacteria had first been pre-exposed to wild-type or *Tep4*  
294 hemolymph. The *Tep4*-dependent opsonization led to a massive uptake of bacteria (median

295 phagocytic value of 162), whereas nonopsonized bacteria (pre-incubated with *Tep4* mutant  
296 hemolymph) were hardly ingested (median phagocytic value of 12; Fig. 6D-E). As expected,  
297 nonopsonized bacteria that were then injected in wild-type recipients were much better  
298 phagocytosed (median phagocytic value of 214), presumably because *Tep4* was circulating in  
299 the wild-type hemolymph (Fig. 6B). They were nevertheless ingested less efficiently than  
300 opsonized bacteria (median phagocytic value of 376; Fig. 6B). Finally,  $\Delta rhII$  bacteria were  
301 also opsonized by *Tep4*, but significantly less than  $\Delta rhIR$  bacteria (Fig. 6B, D). Again, they  
302 displayed a phenotype that was intermediate to that of wild-type PA14 on the one hand, and  
303  $\Delta rhIR$  on the other. We conclude that PA14 and, to a lesser extent,  $\Delta rhII$  bacteria are less  
304 efficiently opsonized and subsequently phagocytosed than  $\Delta rhIR$  bacteria, which are therefore  
305 unable to elude the cellular immune response.

### 306 ***Tep4* plays an adverse role in a PA14 systemic infection model in *Drosophila***

307 A recent study has reported that *Tep4* mutants are more resistant to an infection with the  
308 entomopathogenic bacterium *Photobacterium luminescens* in a septic injury model (Shokal &  
309 Eleftherianos, 2017). By injecting several doses of PA14, from 10 to 1000 cfus, directly into  
310 the thorax of flies, we also consistently found that *Tep4* mutants were surviving better than  
311 wild-type flies in this systemic infection model (Fig. 7A). This difference in survival between  
312 *Tep4* and wild-type flies was largely attenuated when  $\Delta rhIR$  bacteria were injected thereby  
313 establishing again a relationship of altered virulence of these bacteria in this *Drosophila*  
314 genetic background (Fig. 7B). Using the steady-state expression of the antibacterial peptide  
315 gene *Diptericin* as a read-out of the activation of the IMD pathway that regulates the systemic  
316 immune response against Gram-negative bacteria, we found no difference of expression  
317 between wild-type and *Tep4* for doses of 100 or 1000 cfus (Fig. 7C). A difference was noted  
318 however at time points 2 and 8h after a challenge with 10 cfus. As a higher induction of the

319 IMD pathway is unlikely to account for the increased resistance of *Tep4* mutants against  
320 higher PA14 infectious doses, we tested whether the phenol oxidase cascade might be more  
321 efficiently activated in this mutant background, as previously reported (Shokal &  
322 Eleftherianos, 2017). Indeed, we found that pro-phenol oxidase was cleaved to some extent in  
323 *Tep4* but not in wild-type flies. These data further suggest that PA14 bacteria do not  
324 efficiently trigger the prophenol oxidase cascade.

## 325 **Discussion**

326 In this study, we have analyzed the interactions of *P. aeruginosa* with *Drosophila* from the  
327 dual perspective of both pathogen and host. Our data lead us to propose a model in which  
328 RhIR plays a pivotal role in virulence by diminishing the ability of the cellular immune arm of  
329 the host defense response to detect *P. aeruginosa* once the bacteria have reached the internal  
330 body cavity of the insect after crossing the intestinal barrier. Surprisingly, RhIR function in  
331 eluding opsonization by *Tep4* is at least partially independent of the C4-HSL producing  
332 enzyme RhII. These results as well as those of another study (Bonnie Bassler, personal  
333 communication) show that RhIR can function independently of C4-HSL, but they do not  
334 formally establish that RhIR is functioning independently from a quorum-sensing system in  
335 this function.

336

### 337 ***A rhII-independent function of rhIR***

338 *P. aeruginosa* is a pathogen that uses complex signaling mechanisms to adapt to its  
339 environment and its three quorum-sensing regulators (LasR, RhIR and MvfR) appear to be  
340 involved in the regulation of a variety of virulence-related functions (Coggan & Wolfgang,  
341 2012, Jimenez et al., 2012, Schuster et al., 2013). *In vitro* studies, sometimes complemented  
342 by *in vivo* experiments, have revealed that these quorum-sensing systems are intricately

343 intertwined. It was thus unexpected that only the *P. aeruginosa* RhlR regulator appears to  
344 play a critical role for virulence in the *Drosophila* intestinal infection model and not the two  
345 other quorum sensor regulators (Limmer et al., 2011a). Here, we report that  $\Delta rhIR$  null  
346 mutants consistently display virulence levels that are much weaker than those observed with  
347  $\Delta rhII$  mutants (Fig. 1B), do not proliferate in the hemolymph in contrast to  $\Delta rhII$  mutants, and  
348 are phagocytosed and opsonized in a *Tep4*-dependent process more efficiently than  $\Delta rhII$  and  
349 wild-type bacteria. These observations suggest that RhlR functions at least partially  
350 independently from RhlI and presumably independently from C4-HSL activation. In contrast,  
351  $\Delta rhII$  mutants exhibit an impaired virulence in both wild-type and *Tep4* immuno-deficient  
352 flies, similarly to  $\Delta rhIR$  mutants. Both  $\Delta rhII$  and  $\Delta rhIR$  mutants display survival curves with  
353 shallow slopes. Thus, the partially overlapping phenotypes of  $\Delta rhII$  and  $\Delta rhIR$  in flies with  
354 impaired cellular immunity open the possibility that RhlR may also partially function together  
355 with RhlI as a classical quorum-sensing regulator in a process that remains to be delineated.  
356 Interestingly, it appears that RhlR controls gene expression for biofilm formation both in a  
357 C4-HSL-dependent and C4-HSL independent manner (Bonnie Bassler, personal  
358 communication). This putative conventional function of RhlR plays however a minor role in  
359 virulence of PA14 in *Drosophila*, as mirrored by the weak virulence-related phenotypes of  
360  $\Delta rhII$  mutants documented in our study.

361 One possibility is that RhlR gets activated, perhaps in a C4-HSL-independent manner, by an  
362 as yet unidentified quorum-sensing compound. Of note, RhlR does not appear to be activated  
363 by 3-oxo-C12-HSL (Bonnie Bassler, personal communication), the LasR ligand, and, in any  
364 case, *lasR* and *lasI* mutant bacteria display at best only a modestly decreased virulence  
365 phenotype in the *Drosophila* infection model (Fig. S5). The diketopiperazines (DKPs)  
366 represent a candidate family of RhlR-activating compounds (Holden, Ram Chhabra et al.,  
367 1999); however, at least one study failed to detect any interaction of these compounds with

368 LuxR proteins (Campbell, Lin et al., 2009). The resolution of this issue will require testing  
369 mutants that affect the synthesis of DKPs.

370 Another hypothesis to consider is that RhIR may function independently of auto-inducer  
371 molecules. RhIR forms dimers in the presence or absence of C4-HSL (Ledgham, Ventre et al.,  
372 2003). Further studies reported that RhIR functions as a repressor when unbound to C4-HSL  
373 (Anderson, Zimprich et al., 1999, Medina, Juarez et al., 2003). Interestingly, RhIR dimers  
374 seem to bind its target DNA sequence with an altered conformation (Medina et al., 2003).  
375 Finally, transcriptomics studies on *lasR-rhIR* double mutants also revealed several target  
376 genes that appear to be repressed by either LasR or RhIR (Schuster, Lostroh et al., 2003,  
377 Wagner, Bushnell et al., 2003). Thus, a repressor function for RhIR unbound to C4-HSL  
378 cannot be excluded at this stage. Of note, a limitation of all these studies is that they were  
379 performed *in vitro* and not *in vivo*.

380 Finally, our studies on the inactivation of the cellular immune response at different time  
381 points of the infection further support a quorum sensing-independent role of RhIR. Our study  
382 revealed that phagocytosis is required only when very few bacteria are present in the  
383 hemolymph, that is, during the first days of the infection. A caveat here is that we cannot  
384 exclude the possibility that C4-HSL or other cryptic autoinducers might be produced by the  
385 bacteria present in large numbers in the gut compartment. However, if autoinducers, including  
386 C4-HSL, were produced in the intestinal lumen and able to cross the digestive barrier, it is  
387 difficult to understand why they would not immediately activate RhIR resulting in full-blown  
388 bacteremia without the observed lag before the exponential proliferation phase in the  
389 hemocoel. This hypothesis also does not account for why the *rhII* virulence phenotype is  
390 much weaker than that of *rhIR*, unless this reflects the differing opsonization properties of  
391 these mutants.



392 ***RhlR counteracts the cellular host defense by eluding detection by Tep4***

393 Our phagocytosis and opsonization data are consistent with a model in which RhlR controls  
394 the expression of gene products that might mask the site being recognized by Tep4 or a TEP4-  
395 associated protein, presumably on the cell wall. Alternatively, RhlR may actively inhibit the  
396 uptake of opsonized bacteria. The masking or inhibition of ingestion processes may be  
397 sensitive to heat, as wild-type heat-killed bacteria appeared to be more efficiently taken up by  
398 hemocytes than live ones (compare median values for PA14WT in Fig. 6A to those in 6B).  
399 Alternatively, the processes may be unstable and require permanent maintenance that can no  
400 longer be achieved when the bacterial cells are killed.

401 Insect thioester-containing proteins belong to the complement family, and have been shown to  
402 be involved in the opsonization of bacteria in mosquitoes. In *Drosophila*, Tep2 has been  
403 reported to be required for the uptake of *Escherichia coli*, a Gram-negative bacterium, by  
404 cultured S2 cells (Stroschein-Stevenson et al., 2006). In contrast, we find no involvement of  
405 Tep2 in our *in vivo* intestinal infection model with *P. aeruginosa* but do detect a requirement  
406 for Tep4 in phagocytosis and opsonization assays. Given that the structure of mosquito  
407 thioester-containing protein 1 is similar to that of complement family C3, a well-described  
408 opsonin, our data are compatible with a model of direct opsonization of bacteria by Tep4.

409 ***A host factor plays opposite roles in host defense against the same pathogen according to***  
410 ***the infection route***

411 The finding that Tep4 plays a protective function in the intestinal infection model whereas it  
412 is detrimental in the case of a direct systemic infection is paradoxical. This may actually  
413 represent two faces of the same phenomenon. PA14 may have developed a stealth strategy to  
414 avoid detection by the immune system of living organisms and thus may actively hide any  
415 features that might reveal its presence. We propose here that RhlR is playing a critical role in

416 a program that renders PA14 furtive, in keeping with our finding that bacteria likely need to  
417 be alive to escape phagocytosis efficiently (Fig.5). As a result of RhIR action, only a few sites  
418 would be available on the surface of the wild-type bacteria for Tep4 direct or indirect binding.  
419 There, Tep4 would mediate opsonization and then subsequent phagocytosis of the bacteria,  
420 which is an efficient defense when few bacteria enter the hemocoel after escaping from the  
421 digestive tract. Our data in the systemic infection model are compatible with the possibility  
422 that Tep4 competes for these sites with Pattern Recognition Receptors (PRRs) that activate  
423 the systemic humoral immune response and/or the prophenol oxidase cascade. It is likely that  
424 small peptidoglycan (PGN) fragments released by proliferating bacteria represent a major  
425 trigger of the IMD pathway in addition to large PGN fragments directly sensed by PGRP-LC,  
426 thereby accounting for the apparent normal expression of *Diptericin* when flies are challenged  
427 with the higher PA14 inocula. In contrast, we have previously established that some fungi and  
428 Gram-positive bacteria trigger the phenol oxidase cascade through defined PRRs (Matskevich,  
429 Quintin et al., 2010). The situation is less clear as regards Gram-negative bacteria. While the  
430 original characterization of PGRP-LE suggested that it was able to trigger the phenol oxidase  
431 activation cascade (Takehana, Katsuyama et al., 2002), with some genetic data suggesting that  
432 it may actually act non cell-autonomously (Takehana, Yano et al., 2004), subsequent studies  
433 have documented a role for PGRP-LE as an intracellular sensor for PGN fragments (Bosco-  
434 Drayon, Poidevin et al., 2012, Ferrandon et al., 2007, Yano, Mita et al., 2008). Thus, further  
435 work will be required to identify whether Tep4 actually competes with PRRs in the detection  
436 of pathogens. A major challenge will be to establish how RhIR influences the surface  
437 properties of PA14.

#### 438 ***A similar or a distinct role for RhIR in bypassing host defenses in C. elegans?***

439 Except for fungal invasion of the epidermis by nematophagous fungi, how *C. elegans* senses  
440 infections remains poorly understood (Zugasti, Bose et al., 2014). The finding that  $\Delta rhIR$

441 mutants are much less virulent than  $\Delta rhII$  mutants in a *C. elegans* infection model, and that  
442  $\Delta rhIR$  mutants fail to colonize the intestinal tract of worms might be due either to an impaired  
443 escape from detection by the immune system or to a defective resistance to its action. It is not  
444 clear, however, that RhIR-mediated regulation of the production of toxic phenazines, as  
445 shown in the case of PA14-mediated “fast killing” of *C. elegans* (Bonnie Bassler, personal  
446 communication), is the reason the  $\Delta rhIR$  mutant is so dramatically impaired in the *C. elegans*  
447 “slow killing” assay used in our study in Fig. 2A. The major difference in the fast and slow *C.*  
448 *elegans* killing assay is the composition of the agar medium in which the *P. aeruginosa* is  
449 grown and on which the killing assays are performed (Mahajan-Miklos, Tan et al., 1999, Tan  
450 et al., 1999a, Tan, Rahme et al., 1999b). Fast killing is mediated by phenazines (Cezairliyan,  
451 Vinayavekhin et al., 2013, Mahajan-Miklos et al., 1999) whereas slow killing is multi-  
452 factorial (Feinbaum, Urbach et al., 2012), and PA14 mutants deficient in the production of  
453 phenazines do not exhibit a significant killing defect in the slow killing assay (Tan et al.,  
454 1999b). In contrast to *Drosophila*, no cellular host defense has been detected in *C. elegans*  
455 and is unlikely to be involved in the immune response to intestinal infection. The use of  $\Delta rhIR$   
456 mutants will open the way to the identification of the relevant host defense systems that are  
457 circumvented by wild-type PA14 bacteria. In any case, the lack of a significant phenotype of  
458 the  $\Delta rhII$  mutants in the *C. elegans* killing and intestinal proliferation assays is striking. This  
459 can be exploited in future studies to help elucidate the underlying *rhII*-independent  
460 mechanisms involved in RhIR-mediated regulation of virulence.

461  
462 Finally,  $\Delta rhIR$  mutants exhibit reduced dissemination capacities in a rodent lung infection  
463 model when compared to  $\Delta rhII$  or wild-type PA14 (Bonnie Bassler, personal communication).  
464 By analogy to our findings in the *Drosophila* intestinal infection model, it will be interesting

465 to determine whether the complement system restricts the systemic escape of  $\Delta rhIR$  mutants  
466 from the mouse lung into the periphery.

## 467 **MATERIALS AND METHODS**

468 Many methods employed in this study have been described in detail in Haller *et al.* (2014).

### 469 ***C. elegans* killing and intestinal accumulation assays**

470 The “slow-killing” of *C. elegans* by *P. aeruginosa* was monitored using automated image  
471 analysis as previously described (McEwan *et al.*, 2016, Stroustrup, Ulmschneider *et al.*,  
472 2013). To monitor the accumulation of *P. aeruginosa* in the *C. elegans* intestine, wild-type  
473 (N2) animals were used for all experiments. Worms were reared on non-pathogenic *E. coli*  
474 *OP50* on nematode growth media at 25°C. Synchronized L4 worms (fourth larval stage) were  
475 transferred to slow kill (SK) nematode growth media agar plates containing a lawn of *P.*  
476 *aeruginosa* PA14::GFP strains. Post infection at 24 and 48 hours approximately 20 worms are  
477 picked onto a 2% agar pad that contain the paralyzing agent levamisole (1mM). The worms  
478 were imaged in the GFP channel using a Zeiss Apotome microscope with the same exposure  
479 time for all the worms on wild type PA14 and the *rhIR* and *rhII* mutants. Post acquisition the  
480 images were processed using ImageJ software and the area and fluorescence intensity was  
481 measured. The relative fluorescence intensity is plotted and a non-parametric Mann-Whitney  
482 test was used to determine statistical significance.

### 483 **Opsionization assay of live bacteria**

484 Overnight cultures of of PA14, *rhIR*, *RhII*, *sltB1*, *XcpR*, and *vjR* mutants were concentrated to  
485 OD10 in PBS. Twenty third instar larvae were bled in 150  $\mu$ L of the bacterial preparations  
486 and incubated at room temperature for 30 to 45 min. Samples were centrifuged at 500 rcf for  
487 15 min and the pellet (containing larval debris) was removed. A second centrifugation was  
488 performed at 3500 rcf for 15 min to retrieve bacteria in the pellet, that was re-suspended in  
489 10  $\mu$ L PBS. A5001 or *tep4* third instar larvae were injected with 32.2 nL of the live bacteria

490 solutions, using a Nanoject apparatus (Drummont). After 60-90 min of incubation, one larva  
491 was bled in each well of an 8-well pattern microscopy slide that contained PBS. The cells  
492 were left to settle to the bottom for 30 min and were then fixed in 4 % paraformaldehyde for  
493 15 min, in a humid chamber. The samples were washed twice in PBS and they were stained  
494 with a 1/500 diluted rabbit antiserum against PA14 in a PBS solution with 2 % BSA for 2  
495 hours at room temperature. The cells were incubated with a FITC-labeled goat anti-rabbit  
496 secondary antibody (Invitrogen) in a PBS solution with 2 % BSA for 2 hours at room  
497 temperature. After a 20 min permeabilization step in a PBS solution with 0.1 % Triton X-100  
498 and 2 % BSA, a second round of staining with a 1/500 diluted rabbit antiserum against PA14  
499 in a PBS solution with 0.1 % Triton X-100 and 2 % BSA was performed for 2 hours at room  
500 temperature. The samples were then incubated with a Cy3-labeled goat anti-rabbit secondary  
501 antibody (Invitrogen) in a PBS solution with 0.1 % Triton X-100 and 2 % BSA for 2 hours at  
502 room temperature. The slides were mounted in Vectashield with DAPI (Vector Laboratories)  
503 and analyzed using a Zeiss Axioskope 2 fluorescent microscope. 40 to 50 cells per larva were  
504 analyzed: the number of red fluorescent bacteria that were not green fluorescent was counted  
505 for each DAPI-positive hemocyte, and the phagocytosis index was calculated (% of  
506 phagocytes containing at least 1 only-green bacterium)×(mean number of only-green bacteria  
507 per positive cell). We used the nonparametric Mann-Whitney test for statistical analysis.

508

### 509 **Phenol oxidase cleavage assay**

510 The procedure was performed as described (Leclerc, Pelte et al., 2006), except that  
511 hemolymph loads were not adjusted by measuring the protein content of the extracted  
512 hemolymph. The antibody used has been generated by Dr. H. M. Müller against *Anopheles*  
513 phenol oxidases (Muller, Dimopoulos et al., 1999). The ratio of cleaved to noncleaved form  
514 was performed by densitometry scanning.

515 **Statistical analysis**

516 All statistical analysis were performed on Graphpad Prism version 5 (Graphpad software Inc.,  
517 San Diego, CA). Details are indicated in the legend of each figure.

518

519 **ACKNOWLEDGEMENTS**

520 We are grateful to Noémie Schaendel for help in the screen, J. Nguyen, and Gaétan Caravello  
521 for help with some experiments, and to W. M. Yamba and J. Bourdeau for expert technical  
522 help. We thank Dr. A. Filloux and Dr. B. Bassler for the gift of PA14 mutant strains, the  
523 Bloomington Stock Center for *Drosophila* stocks. Dr. S. Niehus provided valuable advice.  
524 We thank Dr. B. Bassler for sharing her work with us prior to publication. This work has been  
525 funded by CNRS, University of Strasbourg, Fondation pour la Recherche Médicale (Equipe  
526 FRM to D.F.), Agence Nationale de la Recherche (DROSOGUT, ANR-11-EQPX-0022) and  
527 US NIH grant R01 AI085581 award to F.M.A.

528

529 **AUTHOR CONTRIBUTIONS**

530 SH, AF, SL, and DF conceived the *Drosophila* experiments and analyzed the data. SH  
531 performed the majority of these experiments, with later work performed by AF with an input  
532 from SL; SS performed the precursor experiments that led to this work. Work on the septic  
533 injury model has been performed by JC, with some help from ZL. *AlasR*,  $\Delta lasI$ ,  $\Delta rhIR$  and  
534 *ArhII* that were constructed by ED and SY, except when indicated otherwise. AH and FMA  
535 conceived the *C. elegans* experiments and analyzed the data, which were obtained by AH. SH,  
536 DF, and FMA wrote the manuscript, with inputs from other co-authors.

537 **CONFLICT OF INTEREST**

538 The authors report no conflict of interests.

## 539 REFERENCES

- 540 Anderson RM, Zimprich CA, Rust L (1999) A second operator is involved in *Pseudomonas*  
541 *aeruginosa* elastase (lasB) activation. *J Bacteriol* 181: 6264-70
- 542 Arefin B, Kucerova L, Dobes P, Markus R, Strnad H, Wang Z, Hyrsi P, Zurovec M, Theopold  
543 U (2014) Genome-wide transcriptional analysis of *Drosophila* larvae infected by  
544 entomopathogenic nematodes shows involvement of complement, recognition and  
545 extracellular matrix proteins. *J Innate Immun* 6: 192-204
- 546 Avet-Rochex A, Bergeret E, Attree I, Meister M, Fauvarque MO (2005) Suppression of  
547 *Drosophila* cellular immunity by directed expression of the ExoS toxin GAP domain of  
548 *Pseudomonas aeruginosa*. *Cell Microbiol* 7: 799-810
- 549 Ayyaz A, Li H, Jasper H (2015) Haemocytes control stem cell activity in the *Drosophila*  
550 intestine. *Nat Cell Biol* 17: 736-48
- 551 Batz T, Forster D, Luschnig S (2014) The transmembrane protein Macroglobulin  
552 complement-related is essential for septate junction formation and epithelial barrier function  
553 in *Drosophila*. *Development* 141: 899-908
- 554 Bier E, Guichard A (2012) Deconstructing host-pathogen interactions in *Drosophila*. *Dis*  
555 *Model Mech* 5: 48-61
- 556 Bosco-Drayon V, Poidevin M, Boneca IG, Narbonne-Reveau K, Royet J, Charroux B (2012)  
557 Peptidoglycan sensing by the receptor PGRP-LE in the *Drosophila* gut induces immune  
558 responses to infectious bacteria and tolerance to microbiota. *Cell Host Microbe* 12: 153-65
- 559 Bou Aoun R, Hetru C, Troxler L, Doucet D, Ferrandon D, Matt N (2011) Analysis of  
560 thioester-containing proteins during the innate immune response of *Drosophila melanogaster*.  
561 *J Innate Immun* 3: 52-64
- 562 Buchon N, Silverman N, Cherry S (2014) Immunity in *Drosophila melanogaster*--from  
563 microbial recognition to whole-organism physiology. *Nat Rev Immunol* 14: 796-810
- 564 Campbell J, Lin Q, Geske GD, Blackwell HE (2009) New and unexpected insights into the  
565 modulation of LuxR-type quorum sensing by cyclic dipeptides. *ACS chemical biology* 4:  
566 1051-9
- 567 Cezairliyan B, Vinayavekhin N, Grenfell-Lee D, Yuen GJ, Saghatelian A, Ausubel FM  
568 (2013) Identification of *Pseudomonas aeruginosa* phenazines that kill *Caenorhabditis elegans*.  
569 *PLoS Pathog* 9: e1003101
- 570 Coggan KA, Wolfgang MC (2012) Global regulatory pathways and cross-talk control  
571 *pseudomonas aeruginosa* environmental lifestyle and virulence phenotype. *Current issues in*  
572 *molecular biology* 14: 47-70
- 573 Elrod-Erickson M, Mishra S, Schneider D (2000) Interactions between the cellular and  
574 humoral immune responses in *Drosophila*. *Curr Biol* 10: 781-4
- 575 Feinbaum RL, Urbach JM, Liberati NT, Djonovic S, Adonizio A, Carvunis AR, Ausubel FM  
576 (2012) Genome-wide identification of *Pseudomonas aeruginosa* virulence-related genes using  
577 a *Caenorhabditis elegans* infection model. *PLoS Pathog* 8: e1002813
- 578 Ferrandon D, Imler JL, Hetru C, Hoffmann JA (2007) The *Drosophila* systemic immune  
579 response: sensing and signalling during bacterial and fungal infections. *Nat Rev Immunol* 7:  
580 862-74
- 581 Gambello MJ, Kaye S, Iglewski BH (1993) LasR of *Pseudomonas aeruginosa* is a  
582 transcriptional activator of the alkaline protease gene (apr) and an enhancer of exotoxin A  
583 expression. *Infect Immun* 61: 1180-4

584 Ganesan S, Aggarwal K, Paquette N, Silverman N (2010) NF-kappaB/Rel Proteins and the  
585 Humoral Immune Responses of *Drosophila melanogaster*. *Curr Top Microbiol Immunol*  
586 Hall S, Bone C, Oshima K, Zhang L, McGraw M, Lucas B, Fehon RG, Ward REt (2014)  
587 Macroglobulin complement-related encodes a protein required for septate junction  
588 organization and paracellular barrier function in *Drosophila*. *Development* 141: 889-98  
589 Haller S, Limmer S, Ferrandon D (2014) Assessing *Pseudomonas* virulence with a  
590 nonmammalian host: *Drosophila melanogaster*. *Methods Mol Biol* 1149: 723-40  
591 Holden MT, Ram Chhabra S, de Nys R, Stead P, Bainton NJ, Hill PJ, Manefield M, Kumar N,  
592 Labatte M, England D, Rice S, Givskov M, Salmond GP, Stewart GS, Bycroft BW,  
593 Kjelleberg S, Williams P (1999) Quorum-sensing cross talk: isolation and chemical  
594 characterization of cyclic dipeptides from *Pseudomonas aeruginosa* and other gram-negative  
595 bacteria. *Mol Microbiol* 33: 1254-66  
596 Hoyland-Kroghsbo NM, Paczkowski J, Mukherjee S, Broniewski J, Westra E, Bondy-  
597 Denomy J, Bassler BL (2017) Quorum sensing controls the *Pseudomonas aeruginosa*  
598 CRISPR-Cas adaptive immune system. *Proc Natl Acad Sci U S A* 114: 131-135  
599 Igboin CO, Griffen AL, Leys EJ (2012) The *Drosophila melanogaster* host model. *Journal of*  
600 *oral microbiology* 4  
601 Irazoqui JE, Urbach JM, Ausubel FM (2010) Evolution of host innate defence: insights from  
602 *Caenorhabditis elegans* and primitive invertebrates. *Nat Rev Immunol* 10: 47-58  
603 Jimenez PN, Koch G, Thompson JA, Xavier KB, Cool RH, Quax WJ (2012) The multiple  
604 signaling systems regulating virulence in *Pseudomonas aeruginosa*. *Microbiology and*  
605 *molecular biology reviews* : MMBR 76: 46-65  
606 Kocks C, Cho JH, Nehme N, Ulvila J, Pearson AM, Meister M, Strom C, Conto SL, Hetru C,  
607 Stuart LM, Stehle T, Hoffmann JA, Reichhart JM, Ferrandon D, Ramet M, Ezekowitz RA  
608 (2005) Eater, a transmembrane protein mediating phagocytosis of bacterial pathogens in  
609 *Drosophila*. *Cell* 123: 335-46  
610 Latifi A, Winson MK, Foglino M, Bycroft BW, Stewart GS, Lazdunski A, Williams P (1995)  
611 Multiple homologues of LuxR and LuxI control expression of virulence determinants and  
612 secondary metabolites through quorum sensing in *Pseudomonas aeruginosa* PAO1. *Mol*  
613 *Microbiol* 17: 333-43  
614 Leclerc V, Pelte N, El Chamy L, Martinelli C, Ligoxygakis P, Hoffmann JA, Reichhart JM  
615 (2006) Prophenoloxidase activation is not required for survival to microbial infections in  
616 *Drosophila*. *EMBO Rep* 7: 231-5  
617 Ledgham F, Ventre I, Soscia C, Foglino M, Sturgis JN, Lazdunski A (2003) Interactions of  
618 the quorum sensing regulator QscR: interaction with itself and the other regulators of  
619 *Pseudomonas aeruginosa* LasR and RhlR. *Mol Microbiol* 48: 199-210  
620 Lemaitre B, Hoffmann J (2007) The Host Defense of *Drosophila melanogaster*. *Annu Rev*  
621 *Immunol* 25: 697-743  
622 Levashina EA, Moita LF, Blandin S, Vriend G, Lagueux M, Kafatos FC (2001) Conserved  
623 role of a complement-like protein in phagocytosis revealed by dsRNA knockout in cultured  
624 cells of the mosquito, *Anopheles gambiae*. *Cell* 104: 709-18  
625 Limmer S, Haller S, Drenkard E, Lee J, Yu S, Kocks C, Ausubel FM, Ferrandon D (2011a)  
626 *Pseudomonas aeruginosa* RhlR is required to neutralize the cellular immune response in a  
627 *Drosophila melanogaster* oral infection model. *Proc Natl Acad Sci U S A* 108: 17378-83  
628 Limmer S, Quintin J, Hetru C, Ferrandon D (2011b) Virulence on the fly: *Drosophila*  
629 *melanogaster* as a model genetic organism to decipher host-pathogen interactions. *Current*  
630 *Drug Targets* 12: 978-999  
631 Lin L, Rodrigues F, Kary C, Contet A, Logan M, Baxter RHG, Wood W, Baehrecke EH  
632 (2017) Complement-Related Regulates Autophagy in Neighboring Cells. *Cell* 170: 158-171  
633 e8



634 Mahajan-Miklos S, Tan MW, Rahme LG, Ausubel FM (1999) Molecular mechanisms of  
635 bacterial virulence elucidated using a *Pseudomonas aeruginosa*-*Caenorhabditis elegans*  
636 pathogenesis model. *Cell* 96: 47-56  
637 Matskevich AA, Quintin J, Ferrandon D (2010) The *Drosophila* PRR GGBP3 assembles  
638 effector complexes involved in antifungal defenses independently of its Toll-pathway  
639 activation function. *Eur J Immunol* 40: 1244-54  
640 McEwan DL, Feinbaum RL, Stroustrup N, Haas W, Conery AL, Anselmo A, Sadreyev R,  
641 Ausubel FM (2016) Tribbles ortholog NIPI-3 and bZIP transcription factor CEBP-1 regulate a  
642 *Caenorhabditis elegans* intestinal immune surveillance pathway. *BMC Biol* 14: 105  
643 Medina G, Juarez K, Valderrama B, Soberon-Chavez G (2003) Mechanism of *Pseudomonas*  
644 *aeruginosa* RhlR transcriptional regulation of the rhlAB promoter. *J Bacteriol* 185: 5976-83  
645 Muller HM, Dimopoulos G, Blass C, Kafatos FC (1999) A hemocyte-like cell line established  
646 from the malaria vector *Anopheles gambiae* expresses six prophenoloxidase genes. *J Biol*  
647 *Chem* 274: 11727-35  
648 Nehme NT, Liegeois S, Kele B, Giammarinaro P, Pradel E, Hoffmann JA, Ewbank JJ,  
649 Ferrandon D (2007) A Model of Bacterial Intestinal Infections in *Drosophila melanogaster*.  
650 *PLoS Pathog* 3: e173  
651 Pean CB, Dionne MS (2014) Intracellular infections in *Drosophila melanogaster*: host defense  
652 and mechanisms of pathogenesis. *Dev Comp Immunol* 42: 57-66  
653 Pesci EC, Pearson JP, Seed PC, Iglewski BH (1997) Regulation of las and rhl quorum sensing  
654 in *Pseudomonas aeruginosa*. *J Bacteriol* 179: 3127-32  
655 Pukkila-Worley R, Ausubel FM (2012) Immune defense mechanisms in the *Caenorhabditis*  
656 *elegans* intestinal epithelium. *Curr Opin Immunol* 24: 3-9  
657 Schuster M, Lostroh CP, Ogi T, Greenberg EP (2003) Identification, timing, and signal  
658 specificity of *Pseudomonas aeruginosa* quorum-controlled genes: a transcriptome analysis. *J*  
659 *Bacteriol* 185: 2066-79  
660 Schuster M, Sexton DJ, Diggle SP, Greenberg EP (2013) Acyl-homoserine lactone quorum  
661 sensing: from evolution to application. *Annu Rev Microbiol* 67: 43-63  
662 Seed PC, Passador L, Iglewski BH (1995) Activation of the *Pseudomonas aeruginosa* lasI  
663 gene by LasR and the *Pseudomonas* autoinducer PAI: an autoinduction regulatory hierarchy. *J*  
664 *Bacteriol* 177: 654-9  
665 Shokal U, Eleftherianos I (2017) Thioester-Containing Protein-4 Regulates the *Drosophila*  
666 Immune Signaling and Function against the Pathogen *Photobacterium*. *J Innate Immun* 9: 83-93  
667 Stroschein-Stevenson SL, Foley E, O'Farrell PH, Johnson AD (2006) Identification of  
668 *Drosophila* gene products required for phagocytosis of *Candida albicans*. *PLoS Biol* 4: e4  
669 Stroustrup N, Ulmschneider BE, Nash ZM, Lopez-Moyado IF, Apfeld J, Fontana W (2013)  
670 The *Caenorhabditis elegans* Lifespan Machine. *Nat Methods* 10: 665-70  
671 Takehana A, Katsuyama T, Yano T, Oshima Y, Takada H, Aigaki T, Kurata S (2002)  
672 Overexpression of a pattern-recognition receptor, peptidoglycan-recognition protein-LE,  
673 activates imd/relish-mediated antibacterial defense and the prophenoloxidase cascade in  
674 *Drosophila* larvae. *Proc Natl Acad Sci U S A* 99: 13705-10  
675 Takehana A, Yano T, Mita S, Kotani A, Oshima Y, Kurata S (2004) Peptidoglycan  
676 recognition protein (PGRP)-LE and PGRP-LC act synergistically in *Drosophila* immunity.  
677 *Embo J* 23: 4690-700  
678 Tan MW, Mahajan-Miklos S, Ausubel FM (1999a) Killing of *Caenorhabditis elegans* by  
679 *Pseudomonas aeruginosa* used to model mammalian bacterial pathogenesis. *Proc Natl Acad*  
680 *Sci U S A* 96: 715-20  
681 Tan MW, Rahme LG, Sternberg JA, Tompkins RG, Ausubel FM (1999b) *Pseudomonas*  
682 *aeruginosa* killing of *Caenorhabditis elegans* used to identify *P. aeruginosa* virulence factors.  
683 *Proc Natl Acad Sci U S A* 96: 2408-13

684 Wagner VE, Bushnell D, Passador L, Brooks AI, Iglewski BH (2003) Microarray analysis of  
685 *Pseudomonas aeruginosa* quorum-sensing regulons: effects of growth phase and environment.  
686 *J Bacteriol* 185: 2080-95  
687 Williams P, Camara M (2009) Quorum sensing and environmental adaptation in  
688 *Pseudomonas aeruginosa*: a tale of regulatory networks and multifunctional signal molecules.  
689 *Curr Opin Microbiol* 12: 182-91  
690 Yano T, Mita S, Ohmori H, Oshima Y, Fujimoto Y, Ueda R, Takada H, Goldman WE,  
691 Fukase K, Silverman N, Yoshimori T, Kurata S (2008) Autophagic control of listeria through  
692 intracellular innate immune recognition in drosophila. *Nat Immunol* 9: 908-16  
693 Zugasti O, Bose N, Squiban B, Belougne J, Kurz CL, Schroeder FC, Pujol N, Ewbank JJ  
694 (2014) Activation of a G protein-coupled receptor by its endogenous ligand triggers the innate  
695 immune response of *Caenorhabditis elegans*. *Nat Immunol* 15: 833-8

696

## 697 **FIGURE LEGENDS**

698

699 **Figure 1: *RhII* displays a distinct phenotype from that of *rhIR* in the *Drosophila***  
700 **intestinal infection model.**

701 Survival experiment of wild-type flies (*w*) fed on wild-type PA14 bacteria or  $\Delta rhIR$  and  $\Delta rhII$   
702 mutants.

703 A. Representative survival curves of infected and noninfected (NI) flies. Flies died faster from  
704 the infection with PA14 WT than  $\Delta rhIR$  and  $\Delta rhII$ . Flies infected with  $\Delta rhII$  exhibited an  
705 intermediate survival phenotype. One representative experiment out of seven is shown.  
706 Statistical analysis of the data is shown in panel B.

707 B. Pooled  $LT_{50}$  data of wild-type flies ( $w^{A500I}$ ) following intestinal infections with PA14 WT,  
708  $\Delta rhIR$  or  $\Delta rhII$ .  $LT_{50}$  of flies after infection with PA14 WT was significantly lower than with  
709  $\Delta rhIR$  (\*\* $p=0.0003$ ) and  $\Delta rhII$  (\* $p=0.0385$ ). Flies were significantly more susceptible to  
710 infection with  $\Delta rhII$  than with  $\Delta rhIR$  (\*\* $p=0.0047$ ). The  $LT_{50}$  data from seven survival  
711 experiments are displayed (biological duplicates are also shown as there was as much  
712 variability between experiments as within experiments), red bars indicates medians. Statistics  
713 have been performed using a non-parametric test (Mann Whitney).

714 C-D. Bacterial titer of the hemolymph collected from flies that had ingested wild-type or  
715 mutant PA14 as indicated, three (C) and five (D) days after the ingestion of wild-type PA14  
716 or mutants as indicated. In this series of experiments, flies infected with PA14 WT had started  
717 to succumb by day five and were therefore not analyzed. Statistics have been performed using

718 the Mann Whitney test; medians are shown. p values for C are respectively from left to right:  
719 0.003, 0.002, and 0.005.  $P < 0.0001$  for D.

720 E. Survival curves of wild-type and latex bead-injected flies after intestinal infection with  
721 PA14 bacteria. In latex bead-injected flies  $\Delta rhII$  regains virulence. Note however that the shift  
722 in virulence is of the same magnitude as that observed for wild-type PA14 and contrasts with  
723 the large shift observed with  $\Delta rhIR$ .

724 F. Pooled  $LT_{50}$  data of latex bead-injected flies ( $w$ -LXB) survival experiments.  $w$ -LXB flies  
725 died significantly slower after  $\Delta rhIR$  infection than with PA14 WT (\*\* $p=0.0065$ ). A slight  
726 decrease of virulence, but at the border of significance, was observed between PA14 WT and  
727  $\Delta rhII$  ( $p=0.0726$ ). No difference in virulence was detected between  $\Delta rhIR$  and  $\Delta rhII$   
728 ( $p=0.3056$ ). Data represent the  $LT_{50}$ s from five experiments (biological duplicates are also  
729 shown as there was as much variability between experiments as within experiments), red bars  
730 indicates medians. Statistics have been performed using a non-parametric test (Mann  
731 Whitney).

732 G. Pooled data of the difference of  $LT_{50}$ s between  $w$  and  $w$ -LXB flies after intestinal infection  
733 with either PA14 WT, the  $\Delta rhIR$  mutant or the  $\Delta rhII$  mutant. There is only a significant  
734 difference between PA14 WT and the  $\Delta rhIR$  mutant (\* $p=0.0244$ ) but not the  $\Delta rhII$  mutant.  
735 Data represent the  $LT_{50}$ s from five experiments (biological duplicates are also shown as there  
736 was as much variability between experiments as within experiments), red bars indicates  
737 medians. Statistics have been performed using the Mann Whitney test.

738 H. Hill coefficients of latex bead-injected flies in PA14 infection. Hill coefficients give an  
739 indication on the slope of the survival curves. Survival curves of  $w$ -LXB flies infected with  
740 PA14 wild-type (PA14 WT) had a significant higher Hill coefficient than survival curves of  
741 flies infected with  $\Delta rhIR$  (\*\* $p=0.0092$ ) or  $\Delta rhII$  (\* $p=0.0405$ ). No significant difference in Hill  
742 coefficient was detected between survival curves of flies infected with  $\Delta rhIR$  or  $\Delta rhII$   
743 ( $p=0.6243$ ). The results from three experiments are shown; red bars indicate medians. Mann  
744 Whitney tests were used for all statistical analyses.

745 **Figure 2: *rhIR* mutants are impaired in their ability to kill *C. elegans* and do not**  
746 **colonize the *C. elegans* intestine.**

747 A, an automated *C. elegans* life-span machine was used to monitor the survival of worms in a  
748 *P. aeruginosa*-mediated killing “slow killing” assay (McEwan et al., 2016). Approximately  
749 200 wild-type *C. elegans* nematodes were fed wild-type PA14,  $\Delta rhII$ , or  $\Delta rhIR$  PA14 mutants

750 (constructed in the Ausubel laboratory (au) or Bassler (bb) laboratories.  $P < 0.001$  (log-rank  
751 test) for PA14 vs  $\Delta rhII$ , PA14 vs  $\Delta rhIR$ , or  $\Delta rhII$  vs  $\Delta rhIR$ . The experiment was repeated  
752 twice with similar results.

753 B-E, *C. elegans* wild-type N2 animals were fed wild-type PA14,  $\Delta rhII$ , or  $\Delta rhIR$  PA14  
754 mutants (constructed in the Ausubel laboratory (B and D) or Bassler laboratories (C and E)  
755 expressing GFP. At 48 h post infection, 13-18 worms infected with wild-type PA14 or the  
756  $\Delta rhII$  or  $\Delta rhIR$  mutants were imaged in the green fluorescent channel.

757 B and C. Representative images are shown.

758 D and E. Images were quantified using ImageJ. There was a significant difference in the  
759 levels of live bacteria between wild type PA14 and  $\Delta rhIR$  ( $p = 0.034$  (D) and  $0.0097$  (E)), and  
760 there were significant differences between the  $\Delta rhIR$  and  $\Delta rhII$  mutants ( $p = 0.0012$  (D) and  
761  $0.0042$  (E)), using a non-parametric Mann-Whitney test. The differences between  $rhII$  and  
762 wild-type PA14 were not significant ( $p = 0.16$  (D) and  $p = 0.95$  (E)). The experiments were  
763 repeated at least two times with similar results.

764 **Figure 3: Phagocytosis is required during the early stage of the infection in *Drosophila*.**

765 A and B, Wild-type *Drosophila* were orally infected with wild-type PA14 expressing dsRed  
766 (PA14-dsRed). After 4 days infected flies were transferred to tubes containing wild-type  
767 PA14 expressing GFP (PA14-GFP). At 5 days of the infection (one day after transferring flies  
768 to PA14-GFP), most PA14 bacteria in the *Drosophila* gut expressed dsRed and only 10%  
769 expressed GFP (A). However, at 6 days (2 days after the transfer of flies to PA14-GFP), only  
770 GFP positive bacteria were detected in the gut. Similarly, in the hemolymph of these flies, a  
771 majority of PA14-dsRed were detected at 5 days but at 6 days only PA14-GFP were detected  
772 in the hemolymph.

773 C, D and E, Measured  $LT_{50s}$  from survival experiments of flies after intestinal infection with  
774 wild-type PA14 (C),  $\Delta rhIR$  (D) or  $\Delta rhII$  (E) mutants and injection of either latex beads (LXB,  
775 grey dots) or PBS (black dots) at different time points of the infection. Latex beads or PBS  
776 were injected either one day before the infection started (-1d) or four hours (+4h), one day  
777 (+1d), four days (+4d) or six days (+6d) after the infection started. White dots correspond to  
778 the survival of infected, uninjected flies. (C)  $LT_{50s}$  of  $w^{A5001}$ -LxB are significantly lower than  
779  $w^{A5001}$  only at -1d (\*\* $p=0.0086$ ) and +4h (\* $p=0.0154$ ). (D)  $LT_{50s}$  of  $w$ -LXB flies are  
780 significantly lower than  $w$  at most times during the infection (-1d: \*\*\* $p=0.0002$ , +4h:  
781 \*\*\* $p=0.0002$  and +4d: \*\* $p=0.0069$ ). (E) A similar phenotype is observed with flies infected

782 with  $\Delta rhII$  (-1d: \*p=0.0395, +4h: \*\*p=0.0085, +1d: \*\*\*p=0.0002 and +4d: \*p=0.0400). Note  
783 however that for injections of latex beads at day4 the difference is reduced, as compared to  
784 earlier time points of injection of latex-beads. The cumulative LT<sub>50</sub> data from at least three  
785 experiments (only two experiments for  $\Delta rhII$ ) are shown, except for +d6; red bars indicates  
786 medians. Statistical analyses were done with an unpaired t-test.

787 F. Difference of LT<sub>50</sub>s between *w*-PBS and *w*<sup>A5001</sup>-LXB flies after intestinal infection with  
788 either PA14 WT, the  $\Delta rhIR$  mutant or the  $\Delta rhII$  mutant. Data represent the differences of  
789 LT<sub>50</sub>s (*w*-PBS and *w*-LxB) from at least two experiments, red bars indicates medians.

790 G. Guts of transgenic flies with GFP-labeled hemocytes were dissected in a manner that  
791 preserves the association of hemocytes with the digestive tract and were examined by  
792 fluorescence confocal microscopy. Green: GFP; blue: DAPI staining of nuclei. Scale bars:  
793 100μM.

794 H. Analysis of hemocytes recruited to the fly intestine upon the infection with either wild-  
795 type PA14, or  $\Delta rhIR$  or  $\Delta rhII$  mutant bacteria. Both wild-type PA14 and the  $\Delta rhIR$  or  $\Delta rhII$   
796 mutant bacteria induce a recruitment of hemocytes to the gut (4h after the beginning of the  
797 infection, for each bacteria p<0.0001). At one day, there are slightly more hemocyte recruited  
798 when infected with wild-type PA14 compared to the mutant. While at 3 days after the  
799 beginning of the infection there are more hemocytes recruited when infected with the  $\Delta rhIR$   
800 mutant bacteria (p=0.0025 between  $\Delta rhIR$  and  $\Delta rhII$ ). Data represent 3 pooled experiments.  
801 Red bars represent the medians.

802

#### 803 **Figure 4: *RhIR* circumvents *Tep4*-mediated host defense**

804 A and B. *Drosophila* wild-type flies (*w*<sup>A5001</sup>), single mutants *Tep3* and *Tep4*, double mutant  
805 *Tep2,3* and triple mutant *Tep2,3,4* were orally infected with PA14 wild-type (A) or the  $\Delta rhIR$   
806 mutant (B) in parallel experiments.

807 A. *Tep4* and *Tep2,3,4* mutant flies are significantly more susceptible to PA14 infection  
808 compared to *w*<sup>A5001</sup>. No difference in survival was detected between the *Tep2,3* mutant and  
809 *w*<sup>A5001</sup>. Surprisingly *Tep3* mutants seemed to be more resistant to infection. B, A strong  
810 enhancement of  $\Delta rhIR$  virulence is observed with *Tep4* and *Tep2,3,4* mutants compared to  
811 *w*<sup>A5001</sup> flies. *Tep2,3* and *w*<sup>A5001</sup> exhibited nearly the same rate of death when challenged with  
812  $\Delta rhIR$ . The *Tep3* mutant seemed again to be more resistant to the infection. In A and B, one

813 representative experiment out of three (each with biological triplicates, except for uninfected  
814 flies) is shown.

815 C. The survival of *Tep4* flies infected with PA14 WT,  $\Delta rhIR$ ,  $\Delta rhII$  bacteria was examined.  
816 Three independent experiments have been performed, each with three biological replicates,  
817 and one representative experiment is shown.

818 D. Quantification of the experiments shown in Panel C. The triplicates were assessed as  
819 independent experiments as there was as much variability between experiments as within  
820 experiments. p values comparing the  $LT_{50}$ s of mutants versus PA14 WT are from left to right:  
821 0.07, 0.003. (Mann-Whitney test).

822 E. Difference of  $LT_{50}$ s between *w* and *Tep4* flies after intestinal infection with either PA14  
823 WT,  $\Delta rhIR$ , or  $\Delta rhII$  bacteria. p values comparing the  $LT_{50}$ s of mutants versus PA14 WT :  
824 \*\*\* :  $p < 0.0001$  (Mann-Whitney test).

#### 825 **Figure 5: *Tep4* is required for phagocytosis of *rhIR* mutant bacteria**

826 A. Heat-killed pHrodo®-labeled bacteria of the indicated genotype were injected into either  
827 wild-type or *Tep4* third instar larvae and incubated for 45 minutes. The hemocytes were then  
828 retrieved. Bacteria present in phagosomes were fluorescent and used to measure the  
829 phagocytic index. Bacteria injected into *Tep4* were significantly less phagocytosed than those  
830 injected into wild-type larvae:  $p < 0.0001$  for PA14 WT and  $p = 0.04$  for  $\Delta rhIR$  (Mann-Whitney  
831 test). Medians are shown.

832 B. The experiment is similar to that shown in A, except that live bacteria were used and a  
833 differential antibody staining protein was used to reveal phagocytosed bacteria. PA14 WT,  
834  $\Delta rhIR$ ,  $\Delta rhII$  bacteria were injected in wild-type or *Tep4* larvae.  $\Delta rhIR$  bacteria were more  
835 readily phagocytosed than PA14 WT both by wild-type ( $p = 0.01$ ) or *Tep4* ( $p = 0.04$ ) hemocytes  
836 (Mann-Whitney test). Medians are shown.

837

#### 838 **Figure 6: *Tep4* is an opsonin that preferentially detects *rhIR* over *rhII* mutant bacteria.**

839 A. Scheme of the experimental procedure. Live bacteria were incubated with either wild-type  
840 or *Tep4* hemolymph and were thereafter injected into naive larvae, which were either wild-  
841 type or *Tep4*. The phagocytosis index was then measured as in Fig. 6B.

842 B-E. Bacteria pre-incubated with wild-type or *Tep4* hemolymph are represented in pairs,  
843 respectively with filled (left) and open (right) circles. Medians are shown. Data were analyzed  
844 using the Mann-Whitney test. \*\*\*:  $p < 0.0001$

845 B. PA14 WT,  $\Delta rhIR$ , and  $\Delta rhII$  bacteria were injected into wild-type larvae. Stars above  
846 symbols report the statistical significance of the data when compared to PA14 WT. \*\*:  $p = 0.007$   
847

848 D. PA14 WT,  $\Delta rhIR$ , and  $\Delta rhII$  bacteria were injected into *Tep4* larvae. \*\*:  $p = 0.01$

849 C, E. These panels display respectively a magnification of B and D to show the low  
850 phagocytic index associated with PA14 WT uptake.

851

## 852 **Figure 7: *Tep4* mutants are more resistant to a systemic infection with PA14**

853 A and B. The survival of wild-type and *Tep4* flies was examined, after injection of PBS as a  
854 non-infected control (NI), or 10, 100, 1000 cfus of PA14 WT (A) or PA14  $\Delta rhIR$  (B) bacteria.

855 C. Relative *Diptericin* expression was measured by RT-qPCR in wild-type and *Tep4* flies, 2,  
856 8 or 24h after injection of PBS (NI), or 10, 100, 1000 cfus of PA14 WT bacteria. Each  
857 experiment was performed independently three times and a representative experiment is  
858 shown (A-C).

859 D. The cleavage of the prophenol oxidase have been analyzed 2 hours after injection of 1000  
860 cfus of PA14 WT bacteria or PBS, by Western-blotting using a pan-phenol oxidase antibody.

861 The intensity of the prophenol oxidase (PPO) and of the cleaved active phenol oxidase  
862 (activated PO) bands was measured and the ratio of the measurements is shown below the  
863 blot.

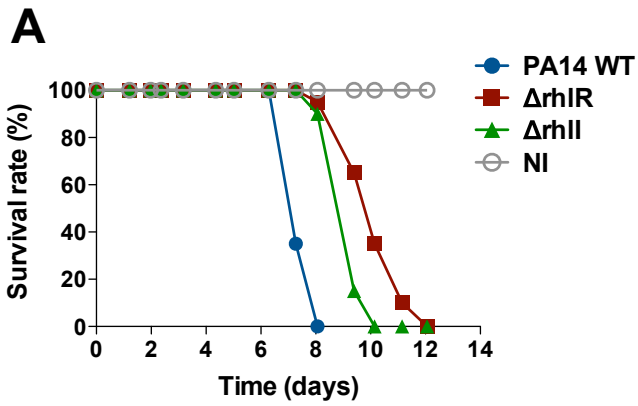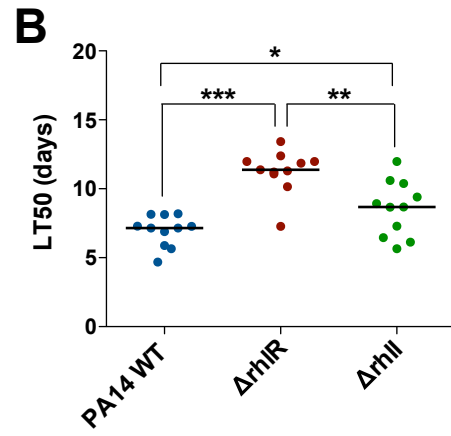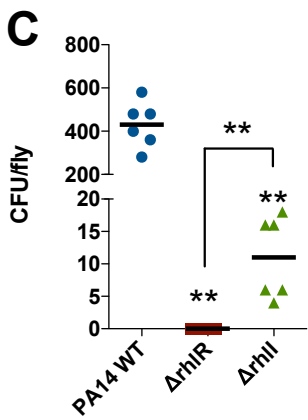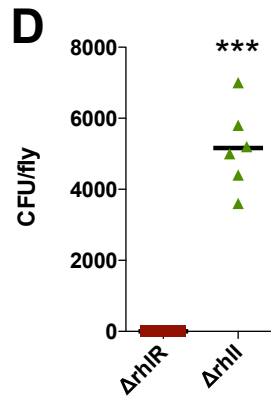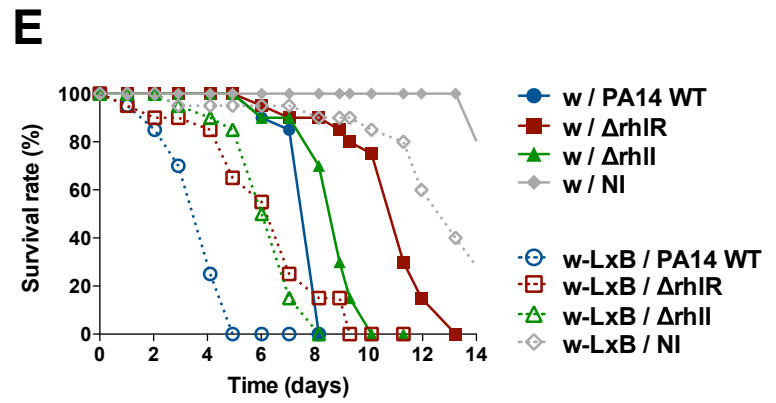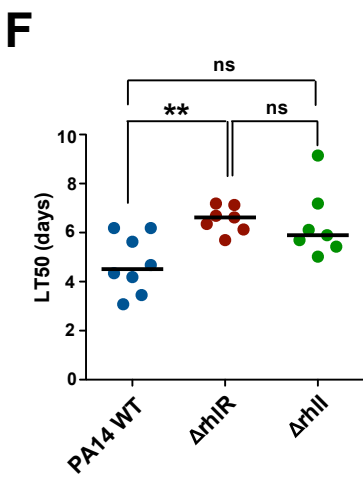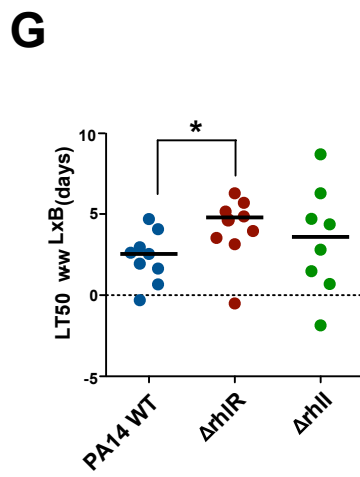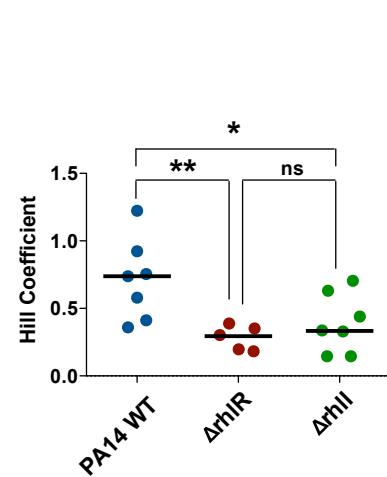



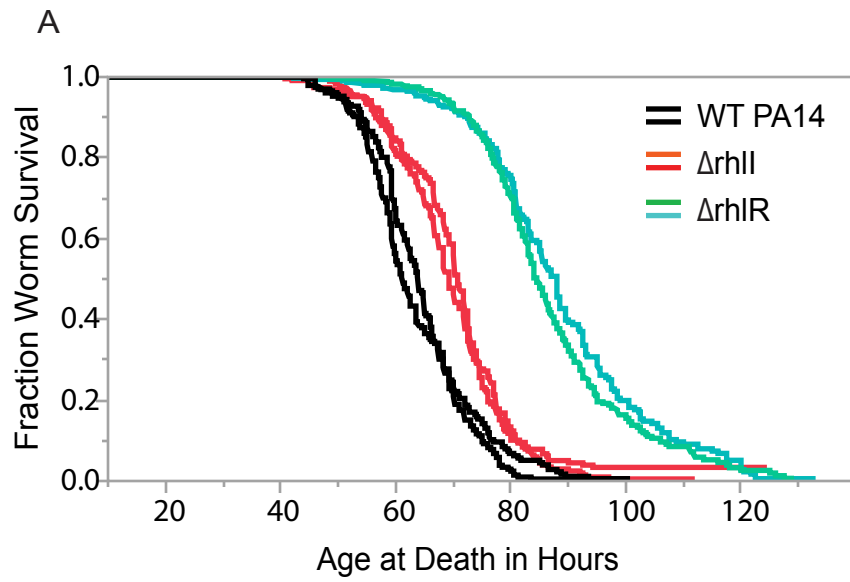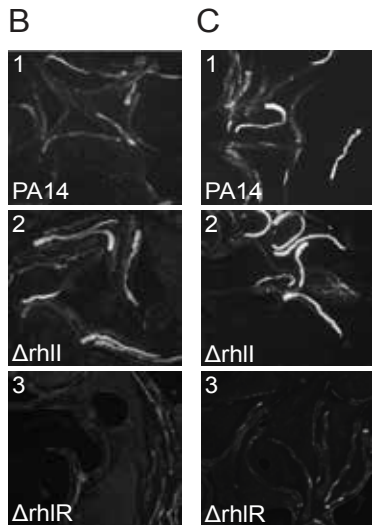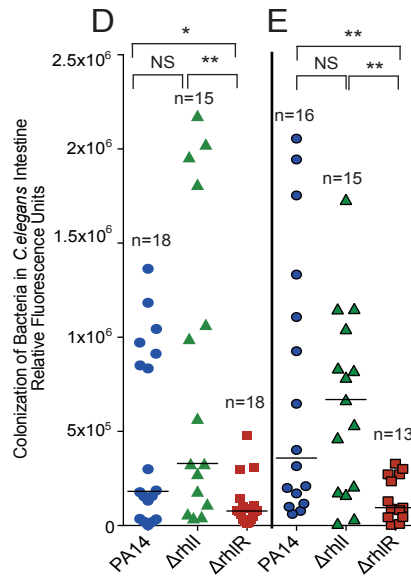

**A**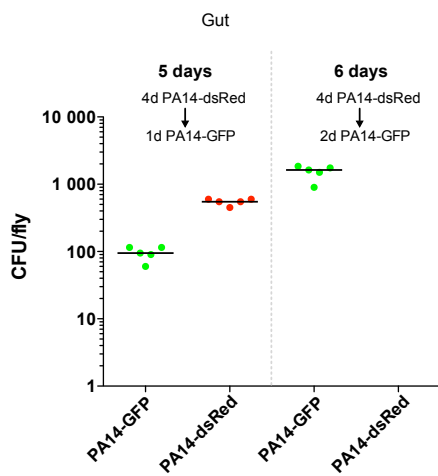**B**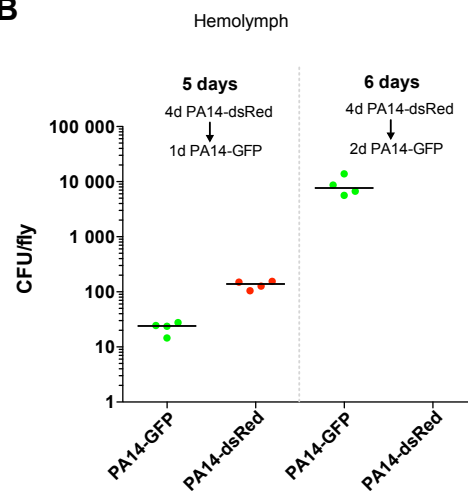**C**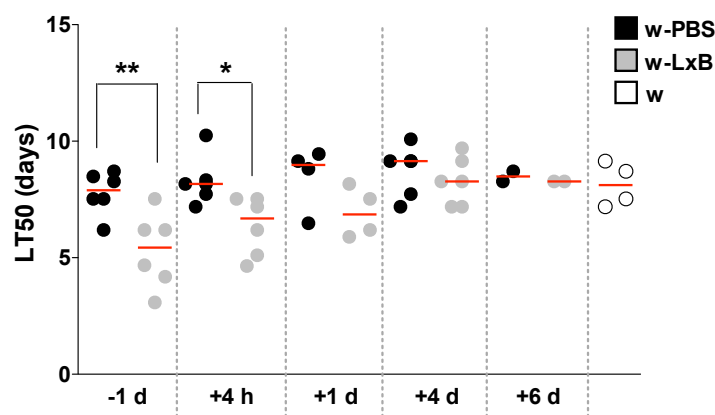**D**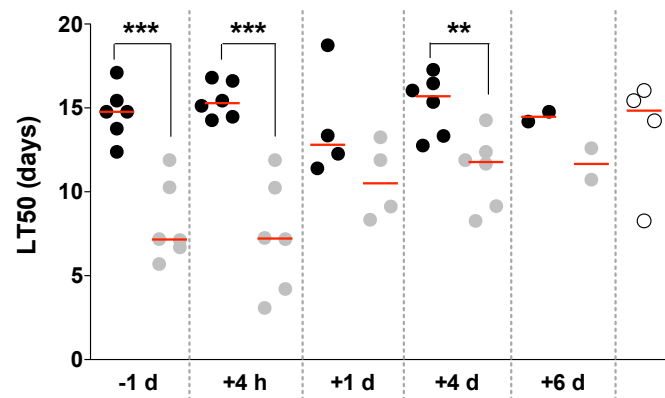**E**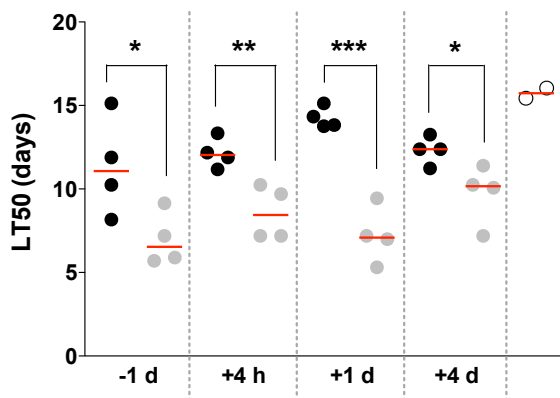**F**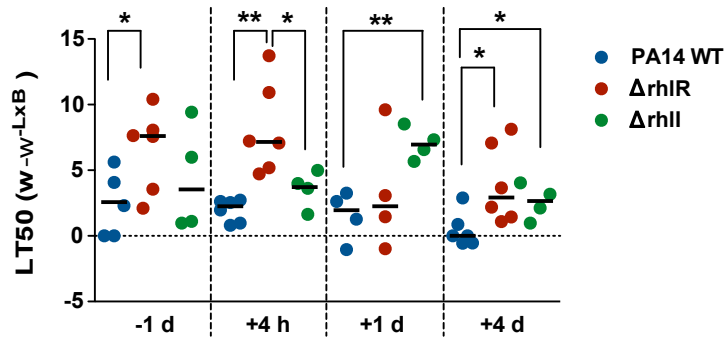**G**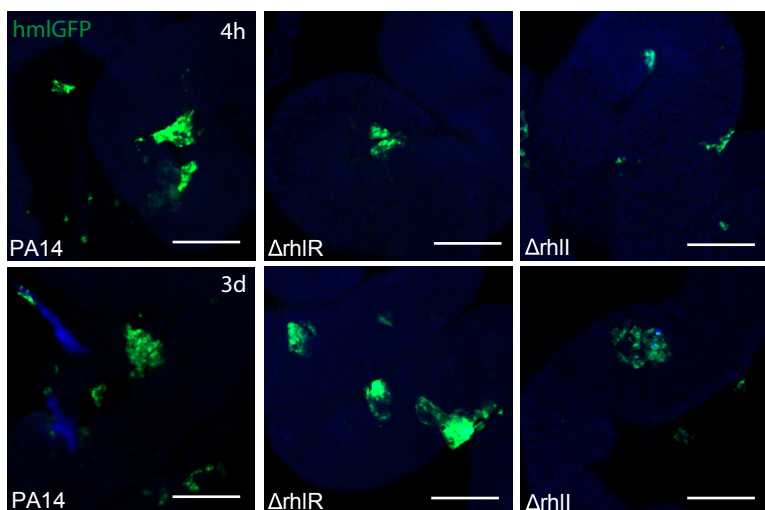**H**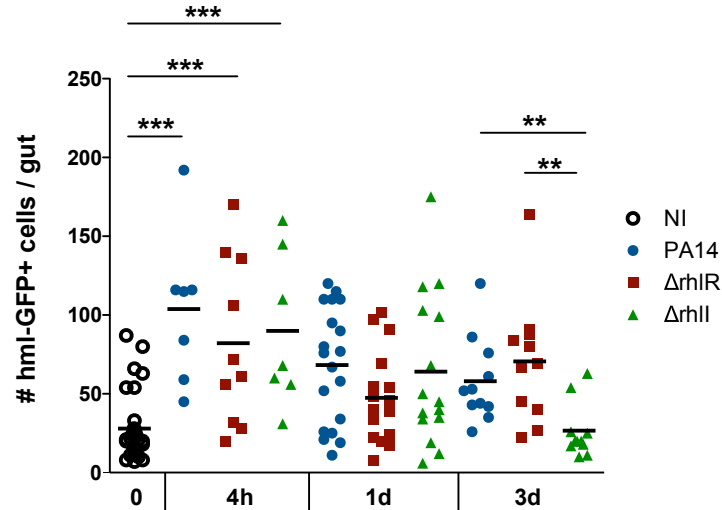

**A**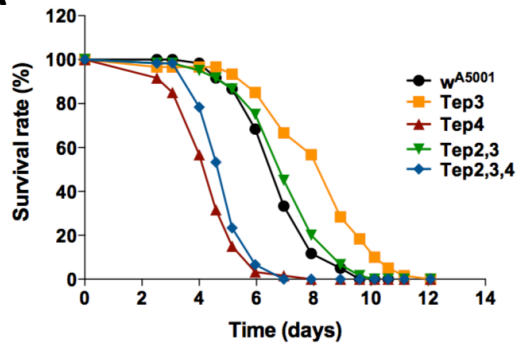**B**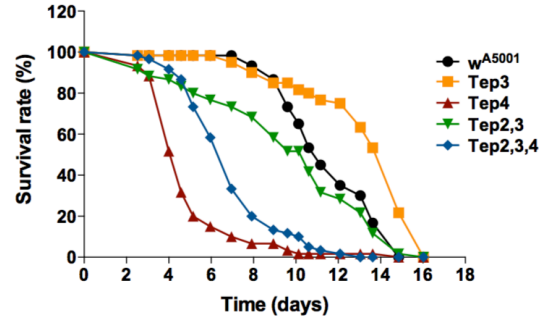**C**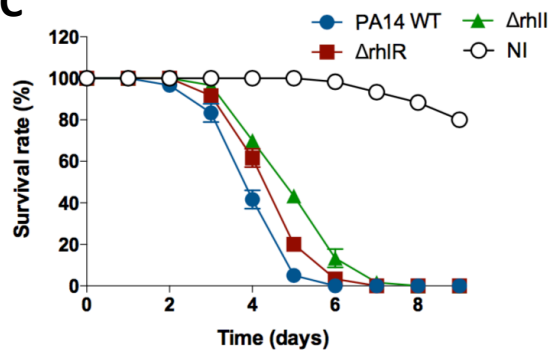**D**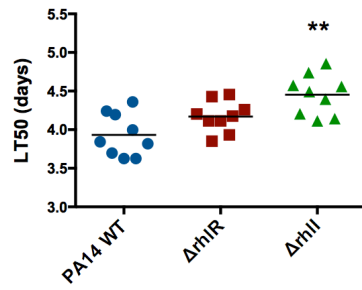**E**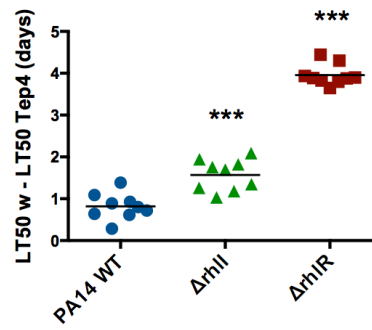

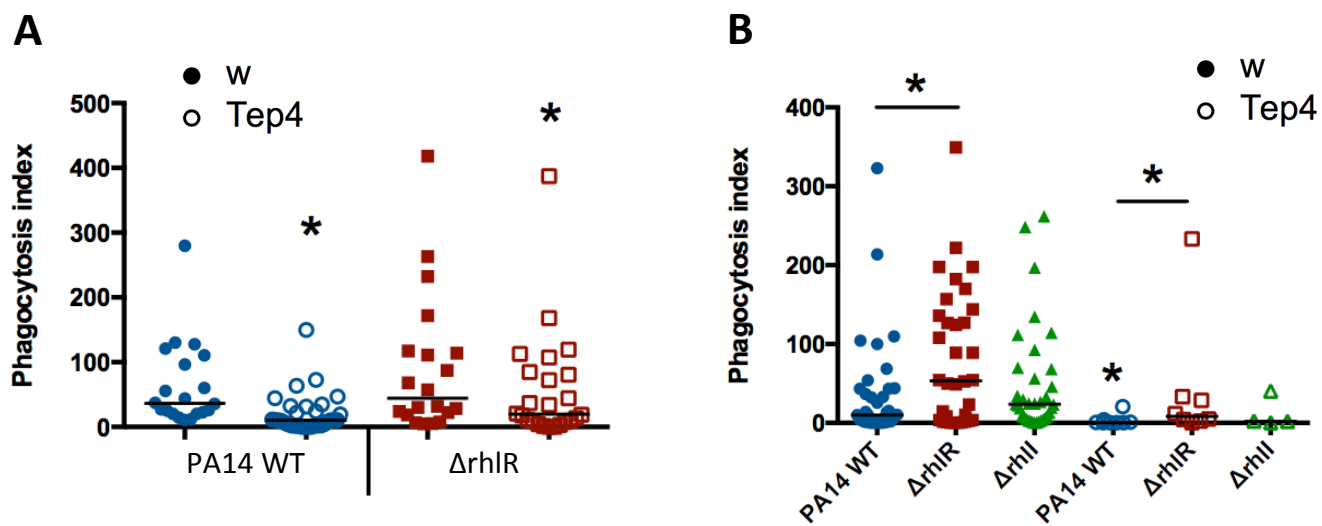

A

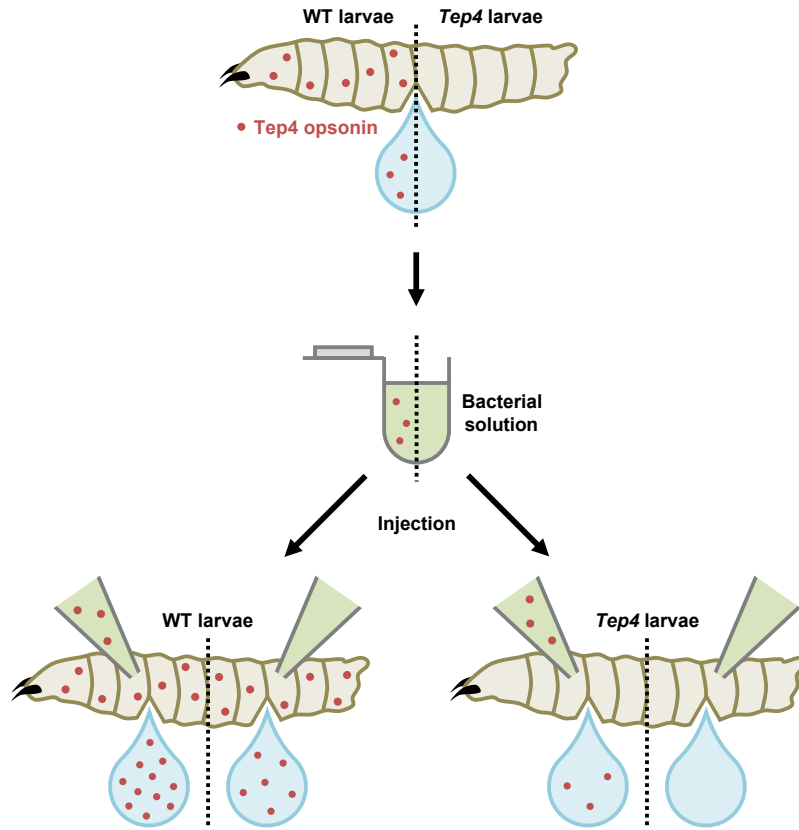

B

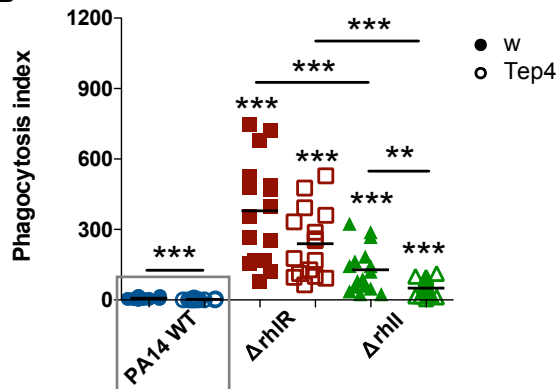

C

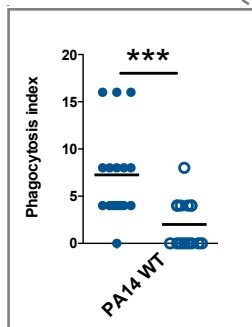

D

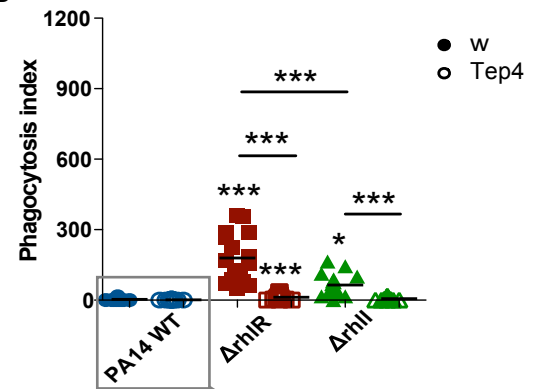

E

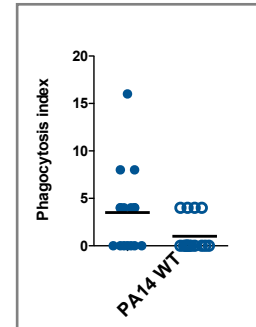

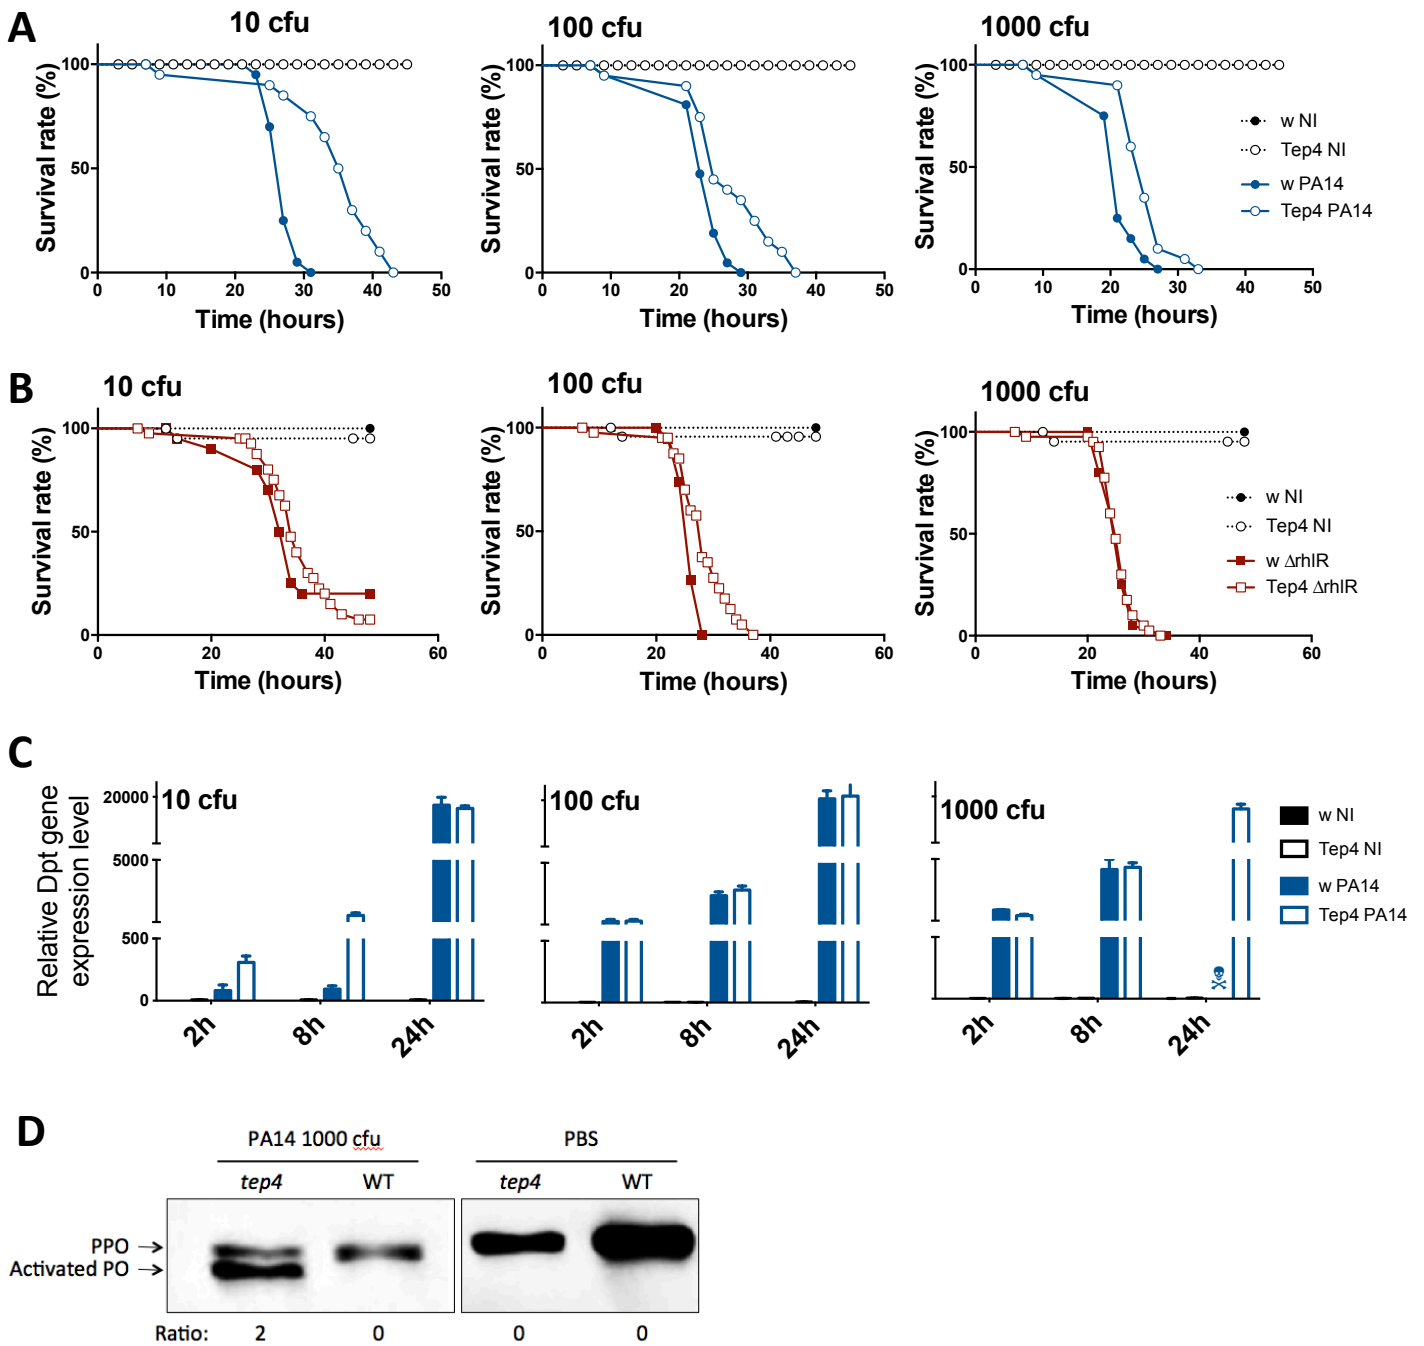

Source: https://www.biorxiv.org/content/10.1101/165530v1.full.pdf
